# Supplementary material
Source: PubMed Central journal article supplement (PMC5786472)
Supplement: NIHMS926512-supplement-8.pdf [file NIHMS926512-supplement-8.pdf]

**TABLE S1. Next generation sequencing read count data for sample libraries, Related to STAR Methods**

| Library Sample | Total Reads | Reads after trimming | Unique Peptide Sequences | Reads corresponding to peptides |
|----------------|-------------|----------------------|--------------------------|---------------------------------|
| 3110 Input 1   | 92120282    | 91884571             | 866613                   | 86064601 (93%)                  |
| 3110 Input 2   | 80692473    | 80481181             | 860093                   | 74870574 (93%)                  |
| 3110 IPTG 1    | 74109070    | 73939734             | 843818                   | 68821863 (93%)                  |
| 3110 IPTG 2    | 82300635    | 82088697             | 850403                   | 76989019 (94%)                  |
