# Supplementary material
Source: PubMed Central journal article supplement (PMC5786472)
Supplement: NIHMS926512-supplement-9.pdf [file NIHMS926512-supplement-9.pdf]

**TABLE S2. MICs of synthesized SLAY peptides and Cecropin P1**

| Peptide     | MIC ( $\mu$ M) |               |               |                    |
|-------------|----------------|---------------|---------------|--------------------|
|             | <i>W3110</i>   | <i>Ab5075</i> | <i>PA14</i>   | <i>NDM E. coli</i> |
| Cecropin P1 | $\leq 2\mu$ M  | $\leq 2\mu$ M | $\leq 2\mu$ M | $\leq 2\mu$ M      |
| P1          | 4 $\mu$ M      | 2 $\mu$ M     | 8 $\mu$ M     | 8 $\mu$ M          |
| P2          | 16 $\mu$ M     | 1 $\mu$ M     | 16 $\mu$ M    | 32 $\mu$ M         |
