# Supplementary material
Source: PubMed Central journal article supplement (PMC5786472)
Supplement: NIHMS926512-supplement-10.pdf [file NIHMS926512-supplement-10.pdf]

**TABLE S3. Selected peptides assayed in 1% tryptone broth and TNG media, Related to Table 2**

| Peptide | Sequence              | MBC ( $\mu\text{M}$ )  |                         |                            |                           |            |               |                    |            |               |
|---------|-----------------------|------------------------|-------------------------|----------------------------|---------------------------|------------|---------------|--------------------|------------|---------------|
|         |                       | <i>E. coli</i> W3110   |                         |                            | <i>P. aeruginosa</i> PA14 |            |               | <i>E. coli</i> NDM |            |               |
|         |                       | <i>TN</i> <sup>a</sup> | <i>TNG</i> <sup>b</sup> | 1% <i>Trp</i> <sup>c</sup> | <i>TN</i>                 | <i>TNG</i> | 1% <i>Trp</i> | <i>TN</i>          | <i>TNG</i> | 1% <i>Trp</i> |
| P6      | LSVDKRPVLHPEHIYGHNHY  | 4                      | 4                       | 16                         | 8                         | 4          | 16            | >128               | 4          | 32            |
| P7      | IHRDQQHESFLDARPEPGLTE | 4                      | 4                       | 8                          | 4                         | 4          | 16            | 4                  | 4          | 16            |
| P9      | PCNPDHDYRPFGNFRIAFTT  | 8                      | 8                       | 16                         | 8                         | 8          | 16            | 8                  | 8          | 16            |
| P10     | TRDTNDLISSRTAAPSMV    | 16                     | 32                      | 64                         | 8                         | 32         | 32            | 32                 | >128       | 32            |
| P11     | LPLPSCSSHGGDADNTSQRN  | 16                     | 16                      | 16                         | 16                        | 16         | 16            | 32                 | 16         | 16            |
| P12     | PNDPDSPCVYRMPNARGCSI  | 16                     | 16                      | 16                         | 16                        | 16         | 32            | 16                 | 32         | 32            |
| P14     | SMLAYVDKNDHINPPHSPRS  | 32                     | 32                      | 32                         | 32                        | 32         | 32            | 64                 | 32         | 16            |
| P15     | DATPHAALFFTVKDHTAGDN  | 32                     | 32                      | 32                         | 32                        | 32         | 32            | 64                 | 32         | 32            |
| P16     | SDDAQRCYPHNRTPFITYYI  | 32                     | 16                      | 32                         | 16                        | 16         | 32            | 32                 | 16         | 32            |

<sup>a</sup>10mM Tris (pH 7.4) + 25mM NaCl (TN), <sup>b</sup>10mM Tris (pH 7.4),+ 25mM NaCl + 0.05% glucose (TNG), <sup>c</sup>1% Tryptone broth
