# Supplementary material
Source: PubMed Central journal article supplement (PMC5786472)
Supplement: NIHMS926512-supplement-11.pdf [file NIHMS926512-supplement-11.pdf]

|                    |                                                                                                                         |
|--------------------|-------------------------------------------------------------------------------------------------------------------------|
| Primer HA          | ATAGTCGACTTAAGCAGCATAATCAGGAACATCATAAGGATAAGCAGCATAATCAGGAACATCATAAGGATAGGTTCTCCGAT<br>ACCCGCAGCTGGAGCC                 |
| Primer dermaseptin | ATAGTCGACTTACGCGTTCGCGCCCACCAGCACCGGTTTCAGCGCTTTCGCCGCCGCTTTCAGCACTTTTTTTTCAGGGTCAT<br>CCACAGCGCTCCTCCGATACCGGCTGCCGGTG |
