# Supplementary material
Source: PubMed Central journal article supplement (PMC5786472)
Supplement: NIHMS926512-supplement-12.pdf [file NIHMS926512-supplement-12.pdf]

# Clustal W Multiple Sequence Alignments by Group for 6,565 Peptides

Multiple sequence alignments for the 81 groups identified in the hierarchical clustering of the top peptide sequences using Clustal W. A consensus amino acid was present in at least 50% of the group for a given amino acid position.

Key:

R -> Polar Positive

D -> Polar Negative

S -> Polar Uncharged

A -> Nonpolar Aliphatic

F -> Aromatic

C -> Cysteine

Group 1

```
## use default substitution matrix

##
## MsaAMultipleAlignment with 37 rows and 24 columns
##      aln                      names
## [1] -ARADRACRASAAAAASRSSR--- 1
## [2] -ADADRACAASAAAAADRAAS--- 2
## [3] --AADAAAARSAAASAADDDSSR-- 5
## [4] -ARRASAAAAASRSAASAASC--- 25
## [5] RADSARCDRSASASAASADRA---- 9
## [6] -ADRARASARSSAASSAASAA--- 28
## [7] SDARSAADACARSAAAAAAS--- 11
## [8] -SARARASARSRSAAAAADAR--- 29
## [9] ARRAADAAARAAAAASASAS---- 16
## ... ..
## [30] --SAAAAAARASRSSARSAD-- 31
## [31] -ARRRAARAASRSAARRRASA--- 36
## [32] -RARRAASAASRSSARSRAAA--- 37
## [33] AAARAAASAASR-AARRRARA--- 35
## [34] -ARRRAC-RCCSARAAARSDAS-- 3
## [35] SARRAAA-AACSAASACRRRA--- 34
## [36] -AD-AAC-RASSACASAAASDASS 4
## [37] RADCAACSRAASACSAARAS---- 8
## Con -?R?A?AAAA??A?A?A?AA?--- Consensus
```

Group 2

```
## use default substitution matrix

##
## MsaAMultipleAlignment with 55 rows and 26 columns
```

```

##      aln                      names
## [1] ----SRASAASASRAARCASARA-- 10
## [2] ---SSRRAASAAAASAAADASAR--- 18
## [3] ----SR-SAASASRSRARCDSARAS- 11
## [4] ---DSCASSSRARASAASSASAS--- 45
## [5] ----SCASSARAAAAS-ASSASA----- 46
## [6] ----SCRSAASAAAADRRSARSS-- 16
## [7] ----SCDSASAASAARRRASAASS-- 22
## [8] ---ASRRAASRAAAAAAARAAAAS--- 14
## [9] ---RRRSAASCAAAASAAARRSAS--- 15
## ... ..
## [48] --ASSDS--CSSAASARSAASSSAS- 25
## [49] --SRADS--ARRACAASSAASSSA-- 27
## [50] --SCARA--ASAASADRASAAASS-- 21
## [51] ----CSS--ASDRSAASDASARSSSS 31
## [52] --SRCSS--AADRSAASAASAASS-- 32
## [53] --SSCSS--ASDAAAASAASAASS-- 33
## [54] ---RCASSRARDASAASAARSAS--- 44
## [55] ---RDAS-RARAASDARAADSASC-- 51
## Con ---????AAA?AA?AA??S?S?-- Consensus

```

### Group 3

```

## use default substitution matrix

##
## MsaAAMultipleAlignment with 150 rows and 29 columns
##      aln                      names
## [1] -----CSACSAS-RC--AASAAARDASS- 46
## [2] -----SARSAS-AS--AADAARSDADRC 144
## [3] -----CSAAAAARAS--SAAAARSDDD-- 114
## [4] ----RRSSAAAASRA--ASAAAARAAS-- 97
## [5] ----RCRSSAAAASRA--ASAAARSRA--- 98
## [6] -----SSAARAAA--DRAASASAAAAAD 14
## [7] -----SSAARAAS--DDAARADDASA- 75
## [8] -----SSSSRASARC--ASAARAAARDA- 41
## [9] -----SSS-ASARC--CRAARADARSAS 43
## ... ..
## [143] ---ASRARSSASASD--AAASCRAA---- 127
## [144] ---SSARRAAAAAAA--AAAAARAS--- 55
## [145] ----AASRARACAAA--AAAAARAR--- 121
## [146] ----DSSRAAAAAAAA--AAAASSRAA--- 54
## [147] ---SSSAAASRAASA--AAAAAAASS--- 61
## [148] ----ASSAASRAAAA--AARAAAASS--- 63
## [149] ----ASAAASAAAAS--ARAAAAAASS-- 62
## [150] ----SAAASRAAAR--ASAAAAAASCS- 66
## Con ----???AAAAAAA--A?AA?AA??-- Consensus

```

### Group 4

```

## use default substitution matrix

##

```

```

## MsaAAMultipleAlignment with 12 rows and 23 columns
##      aln                      names
## [1] -SSRASAARDAARAAAADAAAA-- 1
## [2] --SRAAACRDAAAAACAAACAR- 2
## [3] AADRSRARRDARCAAAAASA--- 3
## [4] --SAAAAARRASARAAAARASR- 4
## [5] --RAAAAARAARAAAAAAASSS- 5
## [6] -RRADAAARSCSSACDAARAS-- 7
## [7] -SSADSAARSASACCAASRCAS- 8
## [8] --SRDCACSSASAACSASAARS- 9
## [9] -SSRRDASRRRAACAASAAS-- 11
## [10] SSRRRRCRRRSARAASASRAS-- 12
## [11] --SADACRRACRSACASSSDAS- 6
## [12] --SRRACSSASSSASAASAAAAAS 10
## Con --SR?AA?R?A?AAAAA?AA??- Consensus

```

Group 5

```

## use default substitution matrix

##
## MsaAAMultipleAlignment with 59 rows and 26 columns
##      aln                      names
## [1] -----SSDRCAASAAAARARAAS--- 2
## [2] -----ASDDAARSAAACARRDASAS- 6
## [3] -----SSSSDSAAADAAAADRAAAC-- 3
## [4] -----SRSS-AAASADAAAAARAASAS 30
## [5] ---SCSSDRDARSAASARAAAASS--- 10
## [6] ---ASSSDRDDRSSASAAAAADS--- 11
## [7] --SSSSADRSSRSAAAAAAAAS--- 4
## [8] -----SASRSSASAAAAASRARS--- 40
## [9] -----SAASRSSSAAAAAASASSS-- 42
## ... ..
## [52] -----AAARAASAAAAASAARCSA- 43
## [53] -----RASARSASAAAARSAAASAS-- 28
## [54] -----ACASSARASASAARSSRAAA- 31
## [55] -----ARASSADRAASAASSSRASA- 32
## [56] -----DAARAASAAAASAAAAASSSAS 37
## [57] -----AADAA-ACASAAAAASSS-- 38
## [58] ---RRARAAAASARAARAAAASAS-- 29
## [59] -----AAAARSAAASRAAAAASASDSA-- 44
## Con ----?????????AAAAAA?A??-- Consensus

```

Group 6

```

## use default substitution matrix

##
## MsaAAMultipleAlignment with 48 rows and 24 columns
##      aln                      names
## [1] --ASRRRARCCASAARCRARA--- 1
## [2] --AAARRARCAASAAASAADDA-- 9

```

```

## [3] --ASRSASRRASSAARADASAA-- 17
## [4] --AARSSARCCSAAARSSSARA-- 2
## [5] --AARSAARRACAARRSDSAAA--- 18
## [6] ---ASRSAARA-RACAAASSAASD 13
## [7] ---CRRRSSRADRARRAASSAAS- 27
## [8] ---CRARSRRA----RAASSASA- 28
## [9] --ASRSSARRS-RCARAASAAAAS- 14
## ... ..
## [41] --SSAARASAAAAARRRAARAA-- 39
## [42] --AAARSAACAAAASRAAAAAA-- 10
## [43] --ASASRASAASAARSCAAARA-- 43
## [44] --ASARRRSACAARDAAAARS-- 44
## [45] --AAARR-SAACAARAAAAARAA- 46
## [46] -SRSARSCRSACAARARAAAD--- 3
## [47] -S-SDASASASCASRAACCARA-- 48
## [48] -S-ARRSRAACA-RASCAARAR- 42
## Con --?????A?RA?AAAA?AAAA-- Consensus

```

Group 7

```

## use default substitution matrix

##
## MsaAMultipleAlignment with 30 rows and 23 columns
##      aln                names
## [1] ----AADRAARAACSARARSR-- 1
## [2] -SARRARRAARAACDACSRRRA-- 19
## [3] --SAAADRAARARRSDSCRRSR- 5
## [4] --SAAARSAARSRSSASCARSAR- 6
## [5] --SRAASRAARRSRAADSRRAA- 11
## [6] --SAAASASACACRSAARCRDR- 7
## [7] SSSAAASSASAAAAASARRC-D-- 25
## [8] --SAASSAARSACSAASARSAR- 2
## [9] -SRAC SARASRRARSRRRASR-- 12
## ... ..
## [23] -SSSCAAR-ASARAASSSAARA- 22
## [24] -SSSAAARSARAASSASAAAC-- 23
## [25] -SSSAAARRARASSDARCAAS-- 26
## [26] ----SADRRRRADAAADRR---- 14
## [27] --SSSASARCRARASADARARAA 27
## [28] -SASRSRAS-RCARARDACSCR- 18
## [29] --ASSDADDRSARARDRCCCR- 20
## [30] ---SSSASRARAARAARCSAARA 28
## Con -S??AA?RAARAA??AR?????- Consensus

```

Group 8

```

## use default substitution matrix

##
## MsaAMultipleAlignment with 8 rows and 21 columns
##      aln                names

```

```

## [1] -SASASAAAARARRSRCRA 1
## [2] -SSASSAAARASRARRRRRA 2
## [3] -SSRSSASSAARRAADARRRA 3
## [4] -RSAACSAARSRAARARRR 4
## [5] -SAASSASACRRRCRRRAAR 8
## [6] -AASSACSSRADRRAASRCAA 5
## [7] SAAASASSSDADCR-ASRAAA 6
## [8] SAASSACARADARRCCSRAR- 7
## Con -SASS???SAA?R??RSR?RA Consensus

```

Group 9

```

## use default substitution matrix

##
## MsaAAMultipleAlignment with 52 rows and 25 columns
##      aln                names
## [1] --ARSSSSR-AAASACASRARSS-- 19
## [2] ---R--DAR-ASASAASSRARSR-- 31
## [3] --SDSSSSR-RARSRASAR----- 24
## [4] --RASRSSR-SARSARSARRRAC-- 25
## [5] -RRAAASSD-SASSRASARAR---- 33
## [6] AASDRSSR-RADS-RSARASA--- 22
## [7] -SADSASSRARARS-RAARASS--- 23
## [8] --SSSSRAR--ASSARSSARRSRA- 27
## [9] ---SSSAAR--ARSARSSS----A- 28
## ... ..
## [45] -RSARASSRCADRSSCSRRAS---- 6
## [46] ---CACAAAAADRSRCRSSSARA-- 9
## [47] --ARAASAAAAACSAARSSSAA--- 10
## [48] ---AASAAAAACSCSARASAAR-- 7
## [49] ---AAAARSASRRASADRDRSA-- 48
## [50] ---SASASAAAACSSRRSSAADR-- 8
## [51] -SASSRAASAAASSSSS-R----- 15
## [52] --ASARASSAAASASSSDRSSC--- 17
## Con --?AA?????A?S??SS?????-- Consensus

```

Group 10

```

## use default substitution matrix

##
## MsaAAMultipleAlignment with 132 rows and 26 columns
##      aln                names
## [1] ---SAARRCSCS--CADSAAS----- 5
## [2] -DSSARRRCSSASRASDASAA----- 30
## [3] ---ASARACSSARAASRASADAR--- 103
## [4] -SAADARRASSS--ASR-SDD----- 18
## [5] -SARAARRASSD--ASDDAADCA--- 20
## [6] --SDRASRARCCRRSAS-RAARA-- 1
## [7] --SRRASRARDCSSAAASDRAA---- 3
## [8] --SARAASARDAASSSAS-RAAA--- 2

```

```

## [9] ---CSSRRRRAACSSDDSAA----- 31
## ... ..
## [125] --SSARRSASAARRARDCASAR----- 54
## [126] --AAS-AARRSRASSDR-SASACD-- 46
## [127] -RASSDAARRSDRRSSR-SAS----- 48
## [128] -RARS-AARASRRSSCRASASA----- 47
## [129] ---SS--ARDRRDSASCSAASSRR- 22
## [130] -DAAS----ASRRASADRSADS--R- 26
## [131] --SAS----ASRRASARASRDSSCRA 119
## [132] --AAS----ACARSSARRARDAD--- 66
## Con --?ASA?A?????????S?A?--- Consensus

```

Group 11

```

## use default substitution matrix

##
## MsaAAMultipleAlignment with 82 rows and 28 columns
##      aln                      names
## [1] -SSRRRACRSS-AARA-ASA---AAR-- 1
## [2] ----RRSAAAR-AARA-ASS---AARA- 8
## [3] --SRAARCRSS-AARASACS---RAR-- 2
## [4] --SRASAAASSRDARA-ACA---RAR-- 3
## [5] --ARRARAAAS-ARAASARA---DAR-- 66
## [6] -SARRARAAAS-A-SASSRA---ASR-- 68
## [7] --ARSADCARS-RSAASAAR---RAA-- 36
## [8] -ASRSADRARS-ASAASAAS---CA--- 37
## [9] -SDASAADARA-ASAASAAR---RA--- 35
## ... ..
## [75] ---ASDARAAAACSADSAAD---CSS-- 14
## [76] ---ASSARSARCASDSSRAD---RSS-- 19
## [77] ---ASSRRSASSARSAAARA---RSS-- 18
## [78] ---ASSRRDSARASAAARAA---RSS-- 20
## [79] ---SAAADRDSCSRDSRA---DAR-- 4
## [80] -AASDAAARAARASRCRSRA---A---- 30
## [81] --ASDDDASARASSRAASRS---RA--- 31
## [82] --ASADRRSAARSDRAAARS---RA--- 32
## Con --????AAA??????A??AA---?A?--- Consensus

```

Group 12

```

## use default substitution matrix

##
## MsaAAMultipleAlignment with 31 rows and 24 columns
##      aln                      names
## [1] ---SSRASRRACSRRAADASASSS 8
## [2] ----SRAARAARSRAACASRDSSS 10
## [3] ---RARAARRRAASAAASSRSRS- 1
## [4] ---RARARASARRARSSSSRSRS- 2
## [5] --SSARCDDASSRAASRSA--SAA 19
## [6] --SSARADAASRRAASARS--AAA 20

```

```

## [7] ---SARADAAARRCADADSRSSS 6
## [8] ---RARRDSASARCAASSSDRS- 5
## [9] ---SASSRSRARASSAAAS----- 29
## ... ..
## [24] ----SRSRDDDRARRSSSASA-- 13
## [25] ---SSSARADADACRSASSASAS- 15
## [26] ---SRSARD-SDASCSSASSASAA 14
## [27] ---SSAARDSSASCSASASSAA- 22
## [28] ----SRARDRSSRARAASSSARAA 16
## [29] ----SSAR---ARARSSDASAASS 31
## [30] ----SSASRSRASDADASSSARSA 17
## [31] ----SSARSSAADAASASSSARSA 18
## Con ---??RAR??A????AASSS???- Consensus

```

Group 13

```

## use default substitution matrix

##
## MsaAAMultipleAlignment with 26 rows and 26 columns
##      aln                      names
## [1] --ARAASACDAARAARAASA--SA-- 3
## [2] --SARRSACDASRAARSASA--AA-- 4
## [3] -RDDSACARAAARRSRASASA--A--- 5
## [4] -R-SSASACSAARRSRASASA--SA-- 6
## [5] --ADRDAADARSAARRASA--AA-- 2
## [6] -----RCASDAARAARAASA---RA- 13
## [7] ---RASRCASDAAA-AAARS---R-- 14
## [8] SACRDSACASAARARAARAA----- 1
## [9] --DRRSARARAARAAAASSR--AR-- 8
## ... ..
## [19] ---RDDDDASDSRAARCRAA--SSD- 25
## [20] -RADCRA-AASSRARAAAASSA----- 20
## [21] ASSDDR--AASSRAAAAAADSA----- 21
## [22] -SDSCRDRRASRS-AAAASRA----- 15
## [23] SDCSAASRRASSSAAASSAA----- 16
## [24] DASSCAADRADSDADAASAA----- 17
## [25] SAASCDARADSRRCASAAA----- 18
## [26] -ADDCCDASDRRDRAAAAAAR----- 26
## Con -?????A?A??ARAAAASA--??-- Consensus

```

Group 14

```

## use default substitution matrix

##
## MsaAAMultipleAlignment with 10 rows and 24 columns
##      aln                      names
## [1] RSASSARRSSSASASARASS----- 8
## [2] RSASRRSASSDSSDAARSSC----- 10
## [3] SSASDAASSASADARSASSA----- 7
## [4] RSASDDSAASAAAASSRCRA--- 6

```

```

## [5] -SAS---ACSAASRSSRADAASSA 9
## [6] RRARR-AAASASSACSRADDA--- 5
## [7] --SRAARADSADAAAARS-C---- 2
## [8] -RRCARASAAARAAAAACDCA--- 3
## [9] -SSRSARSCSDAAAAAASAAA--- 4
## [10] RRCARSSSSAADAAAAARASA---- 1
## Con RSAS?A?ASSAAAAAAR????--- Consensus

```

Group 15

```

## use default substitution matrix

##
## MsaAAMultipleAlignment with 38 rows and 27 columns
##      aln                names
## [1] ---SRAACCCARD----ARSARAAARA 1
## [2] AADSRAACS-AR-----RSASSAAAA 20
## [3] SASDRAARDCCSA----CRAAASA--- 3
## [4] -SSRASACACSA----RRSAASCA-- 4
## [5] --ASSAARRAAADA---ASSCAAAD-- 33
## [6] --ASSAASSAAAAD---SSSAAAAD-- 34
## [7] --RSSSDDRSAAASA---RSDCAADA-- 28
## [8] --RAACDARAARAAD--CSACAAA--- 29
## [9] --RASCDARRAACAD--RSASAASA-- 30
## ... ..
## [31] -ARDSARRSSSDS----AASCAASA-- 14
## [32] AASSSARASADS----ARAASAC--- 38
## [33] -CSRDDASSSSSA----ASAADASAS- 9
## [34] --S-ADASRSSRA----ADASDASASS 10
## [35] --SSARADASSAA----ASAADASRA- 11
## [36] --SCAADRS-SRS----SSAADADASA 8
## [37] --ASAACRARSRS----SASASAAAS- 21
## [38] --SSASDCCRADS----SCSAARARA- 2
## Con --??A?????A??----??AAAAAA?- Consensus

```

Group 16

```

## use default substitution matrix

##
## MsaAAMultipleAlignment with 111 rows and 24 columns
##      aln                names
## [1] ---CSASASARRARDRAAAARAR-- 7
## [2] ---SRAAASASRSARRAAARACS- 70
## [3] ---SSADASASAAARARDAARSAC- 8
## [4] ---SAAAASSAAACARAAARAAC- 102
## [5] --CAAASSASSAARAARSSSAA-- 84
## [6] --CSAAADSSSARAARASSAA-- 85
## [7] ---DSASRASSAARAARASSASS- 45
## [8] --SS-ASSSARAARRSDASASCS- 53
## [9] --SSRASSSARAARDARASRAC-- 68
## ... ..

```



```

## [104] ---SAASSASRAACARAAAASSSS- 43
## [105] ---CSASSASAAAACARASRASSCR 44
## [106] -RDSADASRSDAAACSRRAAS--- 13
## [107] ---SAAASRSDAARCARSASSAS- 15
## [108] ---RASSSRADAAACRARSSSAS- 14
## [109] ---SDASSRSRAAACAAARSSSSS- 42
## [110] --ASR-SR-SSACARCAARRSSRC 1
## [111] --CSRDSRRDSAAARRASCR-AR- 9
## Con --????S????AA?AA????-- Consensus

```

Group 17

```

## use default substitution matrix

##
## MsaAAMultipleAlignment with 71 rows and 27 columns
##      aln                      names
## [1] ----SSSASDRSAARRASSASSSS--- 24
## [2] ----RCAASARAAAAAAAASSSS--- 67
## [3] ----SAASAAASSRRACRASSSSD-- 5
## [4] ----ASSASSAADARAAAAARSSS--- 30
## [5] ----ASSAASAAAASADASSSSSS-- 34
## [6] ----ASSASSAAAASARSASSSSR--- 33
## [7] ---AASDAASARAACASSASSSS---- 36
## [8] ----SAAASRAASSRRRASSSASR-- 6
## [9] ---SSSCAASRAARRARSASSSA---- 23
## ... ..
## [64] ---CSDRASSAAAASAAASASASSA--- 68
## [65] --ACSDRASSAASRSAASS--SSA--- 69
## [66] ---ADDRASSARSSRRASAAASS---- 70
## [67] ----AACRRSSAR-CSRASASSSR-- 7
## [68] ----SRASSSSSRDCSSCSSRS--- 11
## [69] ----SDASDARSDRRDARSSSRR--- 9
## [70] ----SRRARASSRRCSCRSSRR--- 10
## [71] --SCSAASSARSCSRAASR-ASR---- 8
## Con ----???A?AAAA?-?AAA??SS?--- Consensus

```

Group 18

```

## use default substitution matrix

##
## MsaAAMultipleAlignment with 44 rows and 23 columns
##      aln                      names
## [1] -SSSACAAAAAARSA-CSASA- 31
## [2] -SCAAAAAARSDAASS-RACSS- 40
## [3] -SRSDASAAASSRARS-AADSS- 19
## [4] -SSSAAADAAARSSDCSSDRSS- 6
## [5] -ASSAAASAAAASAAAAASRRSS- 9
## [6] -SRRAAAAARSARSRR-SRRSS- 21
## [7] -SSSAAAAAACARSRC-CRRAS- 32
## [8] -AASAAAAAASASCSC-SRRSS- 8

```

```

## [9] -SRSDSAASAARDSDSRASS-- 23
## ... ..
## [37] -SSDAAAAAAAAASSRARACSS-- 20
## [38] SSAAAAAAAAAASSARACSAS-- 41
## [39] SRCASAAAAAAAAACSSRASASS-- 18
## [40] ---AAAAAAAAARAARCRADASA 26
## [41] ---ASAAAAAAAAAARCRRSASS 39
## [42] SACAAARAAAAAAAAARSRRS--- 37
## [43] --AACADAASDDACCRCSDD- 1
## [44] -RCAAADAAAADACCAARSRA-- 2
## Con -???AAAAAAAAA????S?- Consensus

```

Group 19

```

## use default substitution matrix

##
## MsaAMultipleAlignment with 16 rows and 23 columns
##      aln                      names
## [1] --AADAAAAADRSDSAASACC- 4
## [2] --AADRARAAACRACARSSACS- 5
## [3] -RDRARASRRAARSADSASCC-- 1
## [4] -SARARADACAADASDDSSAC-- 2
## [5] RDASAAAC-AAARCSDASSC-- 3
## [6] --AAASRCDSAAARSDASSSSA- 11
## [7] --ASAAAS-RAARACDAASSACA 6
## [8] --AAS-SAAAAADARAADRAAAA 8
## [9] -AAD-CASAAAAARSARARA- 14
## [10] -SAAR-AACAAARRAASDAARA- 13
## [11] -ARSR-CDDASADRSCASAASA- 9
## [12] -AASD-CASRAARCSCASSASA- 10
## [13] DAASRACADAAARSSCAAAA--- 12
## [14] -AAAAASACAAARDSCSARSA-- 15
## [15] -AASSASASAAARRSDSAASA-- 16
## [16] -AASAAAAADAARRAADASSC-- 7
## Con -?A???AA?AAAR?S?AASA??- Consensus

```

Group 20

```

## use default substitution matrix

##
## MsaAMultipleAlignment with 50 rows and 26 columns
##      aln                      names
## [1] ---DSARSSARADASRASAS-ACA-- 17
## [2] ----SARSSCDARAADASASSARA-- 18
## [3] --RASARAAAASRASSASAAAA---- 36
## [4] --SAAARAAADARASSASASSA---- 38
## [5] ----RSCSRASSCADAAARCSSAA-- 20
## [6] ----SSCSSAASAASAAAASSSAA-- 27
## [7] ---SRRASSARSCAAARSRASAA--- 26
## [8] -SCSRASASAASSASAAASRAS----- 32

```

```

## [9] --AASSSAARCSC-AAASSCAA--- 41
## ... ..
## [43] ----RAASASSASA--AAADSAD--- 8
## [44] -RACR-AAASSARASAR-SDAAA--- 4
## [45] --SCRAAAAASAARAAAR-SDSAA--- 5
## [46] ---CR-AASSSASAAAASDSADSADA-- 7
## [47] ---ARRSSAAAAAARSRAAAA----- 24
## [48] -SRARASSAAAAAARRASAS----- 25
## [49] --ARRASSAACAAAASRADRRA----- 23
## [50] -RSARASSASADAAACRSSDR----- 19
## Con ---????SAAAAAAA????SA?--- Consensus

```

Group 21

```

## use default substitution matrix

##
## MsaAAMultipleAlignment with 33 rows and 24 columns
##      aln                      names
## [1] -ARAAACAAAAASASARRADAS-- 1
## [2] --DDAAAAAAAAAASARRARAC-- 31
## [3] -RRSADAAAAAAAAASARSADS--- 6
## [4] ARRSAAAASAAAAASARDAS---- 7
## [5] -ASASRAAAAAAASADRRSAS--- 3
## [6] -ACAARAAAAAASASRSARSS-- 4
## [7] --DAACARDCAAADAARDARSA-- 32
## [8] ---ARRAARSSAAAADADASSAS- 21
## [9] ---ARRASRSAAAAASAAAA----- 28
## ... ..
## [26] --RAAADAAAAASARARSASC-- 5
## [27] --RAAAAAADAARAARACARSS-- 15
## [28] --RASAAAAAARR-RASSRRSD- 12
## [29] --SAASADAAAAAS-RASSRASA- 13
## [30] -ADCRDARAASAAAAASASAS-- 16
## [31] -ADAASSRAASAADASASACAS-- 19
## [32] --DAASCRRASAAARADRASAA-- 33
## [33] -DDAASSAAAAAASAARARS--- 30
## Con --?AAAAAAAAAAAAA?A?A?A?-- Consensus

```

Group 22

```

## use default substitution matrix

##
## MsaAAMultipleAlignment with 14 rows and 23 columns
##      aln                      names
## [1] SDAASSASRDRRCCSSSASAA-- 1
## [2] SDAASRCRAARRCCRRSAAS--- 13
## [3] SAACSSACAASRCCSSSAAAS--- 12
## [4] AADSASAASCRCCRAAARA--- 9
## [5] SAASCRAADSR-CARAAS----- 14
## [6] SDRDADASCRAASASASAA--- 6

```

```

## [7] SADSAAASARSCRDSRARA--- 8
## [8] --SA-AADSSSDCARSSSADSAA 2
## [9] --SA-ASASADSCARSSSSDSAS 3
## [10] -SAARASASDRACRSASAAAS-- 10
## [11] --SARASACSAAC-RSASAAASA 11
## [12] --ARDSASDSAACRSSSSRAA- 4
## [13] --ARDDASSSAAADCSSAASAA- 5
## [14] -SAADDAAASRAAASASSSSA-- 7
## Con -?AA??AA?SR?C?RSSA??-- Consensus

```

Group 23

```

## use default substitution matrix

##
## MsaAAMultipleAlignment with 76 rows and 25 columns
##      aln                      names
## [1] -----SASASAAAASSAAS-AA---- 35
## [2] -SSAASASASCAASSAAS-AAA--- 43
## [3] -SSADSASRSAAADSCCS-AAS--- 2
## [4] CSSDASAARSASARSSSA-AA---- 41
## [5] CSCAASASSSAAAASSSA-AA---- 42
## [6] -SSASAASDCAAAASAAAS-ASS--- 15
## [7] -AAAAASSDCAAAACSAASCASS--- 16
## [8] ARSASAASDAAAASSAAARA----- 66
## [9] -ASAAAASSSAAASRSSS-AAA--- 18
## ... ..
## [69] --SACAACASAC-CSAAAASSRA-- 23
## [70] --ASCSA-ACAAAAAASSAASAA-- 65
## [71] ---SASAASACACSSSAACAADA-- 68
## [72] ---SSSAASASACSRACSCAAD--- 69
## [73] ---SSSAASACCRASAACCSSA-- 20
## [74] -----ACSSAAAASSASRSAAA-- 40
## [75] -----DSSAAAASSCSASAAS-- 46
## [76] ---SCAADSSCACASACRRSSAD-- 21
## Con --???SA?S??AA?AAAA?AAA?-- Consensus

```

Group 24

```

## use default substitution matrix

##
## MsaAAMultipleAlignment with 20 rows and 23 columns
##      aln                      names
## [1] --SADRACSCRADAARSAAAD- 15
## [2] -ASRASAASSAAAAAARS-AAD- 17
## [3] SARSSARSRRRRRSRAARAS--- 6
## [4] -AASSRSARRRRRRAACSCA-- 10
## [5] -ARSSAAARRDRASAAADSAS-- 5
## [6] -ARASRRRARARRRADASSSS-- 9
## [7] -ARACRRRASAARRAAR----- 16
## [8] --RASSASASDRRRASAACDRD- 8

```

```

## [9] -DASSARAAAADRRASA-AAAR- 7
## ... ..
## [13] -RSSADASRAARRCRSACDSA-- 1
## [14] --SAASASRCARRCRSACASDR- 2
## [15] ---SASSRRARRRSSARADASS 3
## [16] --SAASSRRARRRASA-ARCAS 4
## [17] --AAADASACAADAARCRAARS- 11
## [18] -SAAADSAASAARAARRRAAR-- 12
## [19] --RAASRSSSAACASARRAASS- 13
## [20] --RADSRADSAAASSRRAARRS- 14
## Con --?A?????ARR?A?A?AA??- Consensus

```

Group 25

```

## use default substitution matrix

##
## MsaAAMultipleAlignment with 30 rows and 23 columns
##      aln                      names
## [1] ---SRSSACAAAARRSAAAASA- 18
## [2] --ASASSRCAASSARSADSASA- 29
## [3] --SARSSRCAAAAAARAASASAA- 30
## [4] -SDARSSAAAAASACASAAAA-- 22
## [5] --AARSSRAACDSARASADAAS- 28
## [6] -SADRSSAARAAAAADSASAS-- 26
## [7] -SAARSSASSAARAADSARAS-- 27
## [8] ---SRSSRSASACAADAASD-- 10
## [9] ---SRSSSSDSAAAAADSASCAS 12
## ... ..
## [23] -RSRSRSSAAARSSAADRSRR-- 1
## [24] -RSASRSSARCASSCAASSAR-- 2
## [25] --SR-SSCRAAAAAASAAARRSA 19
## [26] --SC-RSAAAAAASSASRSARCA 20
## [27] -CASRSSAAAAARASDAAACRA-- 5
## [28] SCARSSSAAAAASASSADRSS--- 21
## [29] -RDSRSSRAAASSACAAACRR-- 6
## [30] -R--RSSACASSSAAAAACARDS 8
## Con --S?RSS??AA?AA?AAA?A??- Consensus

```

Group 26

```

## use default substitution matrix

##
## MsaAAMultipleAlignment with 126 rows and 32 columns
##      aln                      names
## [1] -ASSARSSSA----RACASASDARSS----- 61
## [2] -----SSSA----RACSSASAAAAS----- 104
## [3] ----SRASSA----RASASCDAARSRAC---- 1
## [4] ----SASCAA----RAAAASRDRRSASS---- 7
## [5] ----AASSSA----RAAASDASRSSAAS---- 44
## [6] ----SDASSA----RADAAAADASSASA---- 4

```

```

## [7] -----SSDSA-----RASAAASASSSARSD--- 34
## [8] -----SSSSSS-----AASAAADASSRAAS---- 42
## [9] -----SRSSSA-----AAAAAAASSARASS---- 43
## ... ..
## [119] -----RCCSS-----DSCSSASDARASASS--- 89
## [120] -----AR-----ASCSDASSARASA----- 117
## [121] ---RSADAAA-----ASCSRASSSARSA----- 39
## [122] ----SASSAA-----SSRSDASSS----- 109
## [123] ----SASSS-----AARASARASASSCRA--- 71
## [124] -----SSS-----AACSSASSSAAS----- 103
## [125] --ARSSRSAS-----RAARSASRSADS----- 88
## [126] -----RASS-----RACSSASRSDDSS----- 124
## Con ----???SS?-----?A?????A??????---- Consensus

```

Group 27

```

## use default substitution matrix

##
## MsaAAMultipleAlignment with 93 rows and 26 columns
##      aln                      names
## [1] --ACSSASSRRSACS-RAAADA--- 5
## [2] --SCSSRASDASSAAS-RAAASA--- 6
## [3] --SCSASASARSSRRS-ARAASA--- 73
## [4] ---SSRSACASASDRS-SAAAAAR-- 41
## [5] ---CAASASARARDRS-SAAAAAA-- 79
## [6] ----SDSASSRAARRSASAAACAA-- 52
## [7] ---SSAADCAASSRSSASAASDA--- 58
## [8] ---SSAA-AAASSRSSDSAARDRR-- 59
## [9] --CSSASAADRRSRS-AADSAS---- 90
## ... ..
## [86] -----CSSSRCARSRAACSDAACSC 89
## [87] ----DADSSADSARASAASAAAAA-- 83
## [88] ---SSSSACSSRRRASRSAARDAAS-- 65
## [89] ----SSSACSSRRASASARDSSAA-- 66
## [90] ---SSASACS-RRAAACASSRDAS-- 87
## [91] ----SADARSARRARCARSAAARAR-- 76
## [92] ---ASADARSASSAASSASAAAA--- 81
## [93] ----SADARSSASRRRARASRSSA--- 78
## Con ----S?S?S?????A???AAAA?-- Consensus

```

Group 28

```

## use default substitution matrix

##
## MsaAAMultipleAlignment with 95 rows and 28 columns
##      aln                      names
## [1] --RSSAARRAADAA-----SRRSACAA-- 68
## [2] --RADAARRSSDAA-----SASRACAA-- 70
## [3] --RSACARARADAA-----SRRRRARRA-- 67
## [4] -SCDSSARRAAAAA-----SRR-ARRA-- 2

```

```

## [5] --SSSAAAAASAA----DSSRASRS-- 3
## [6] -SACSRAAAAASAA----CCSRRAR--- 20
## [7] -RSSRAAAAARCRA----ARRRASR--- 84
## [8] -CSASARRSSASAA----SRASRSA--- 9
## [9] SARRAARASAASAS----SRSSRSA--- 12
## ... ..
## [88] -SSR-ASSASDASA----SARSARARA- 7
## [89] -SCR-DSASRDADC----SARRADAR-- 74
## [90] -SSRSASRADRADA----CARRAAA--- 75
## [91] -SSRDASSSAARA----CRRRAAR--- 90
## [92] ASSRRASRSDRRD----RAAASC---- 41
## [93] -RSSRAASAAARRD----RADCSAR--- 85
## [94] -SDSSAARAADRCS----RARAAAS--- 72
## [95] -SSSRARASDRAC----SARAAAR--- 73
## Con -????A??A?????----?AR?A?A--- Consensus

```

Group 29

```

## use default substitution matrix

##
## MsaAMultipleAlignment with 35 rows and 25 columns
##      aln                      names
## [1] ---RAADASRRAAARSAAAAADS-- 1
## [2] ---RASRACASAAARSASAASSS-- 9
## [3] --ARAACAASRARACSAAAAASD--- 15
## [4] -SSADAARAARAAAASAAAAAAS--- 5
## [5] -ASAAAAASASRRAASAAAAAA---- 7
## [6] ----RAAAAAARRAASAAASAAA--- 6
## [7] --AAAAAAAAARAAAASAAAAAA--- 4
## [8] CRAADAA-ARRADSACAAAAS---- 3
## [9] ---ADAARAARADSASADDASSD-- 16
## ... ..
## [28] --AACSSADADSRRASAR-AAAR-- 22
## [29] ---AAASADSDSRRAAARSADAR-- 23
## [30] --AAASAADSSARRASSSAAAAAS-- 35
## [31] -RADAASASCRRASSSA--AAA-- 17
## [32] --SDAASASCASRARSSSRRAAA-- 18
## [33] --CDDAS-SCSRR-RADS-ASSSAS 20
## [34] --SRDAS-SCARA-RSDS-AASS-- 21
## [35] --CDADA-SCRRRARSDRRAASS-- 19
## Con --??AA?AA??????SAAAAA??-- Consensus

```

Group 30

```

## use default substitution matrix

##
## MsaAMultipleAlignment with 106 rows and 28 columns
##      aln                      names
## [1] -SARDAARASAASSCCSCAAS----- 56
## [2] --DRAAASACAASSRDACAASS----- 66

```

```

## [3] ---RCCARASASSSSDACAAASRS----- 67
## [4] ---ASRSDSAASCACASSRRS----- 58
## [5] ---RSAASASARSAACASSASSS----- 69
## [6] ---ASAASSRCAADASSSDSSRA----- 15
## [7] ---ASACAASSSRAARAADRASA----- 3
## [8] --SACASAARSSSAARAADSSS----- 78
## [9] ---ADASARSSSSASRARDSASS----- 75
## ... ..
## [99] --SRRRRSSASRAASDASRAAA----- 2
## [100] -----RSDSSRADRSAACAAASS----- 68
## [101] --SRAASSSASRDDRSSRDSA----- 35
## [102] RSSAASRSAASCRRSSR--ASA----- 28
## [103] -SCAASRSSASSAASSD--ASAS----- 82
## [104] ---SSAASAASACRSSARDAASS----- 71
## [105] --RSSSASAASADRSSA-SAASS----- 72
## [106] -SRSASRSSASACRCSA--AASA----- 33
## Con ---??A??A?S????????S?----- Consensus

```

Group 31

```

## use default substitution matrix

##
## MsaAAMultipleAlignment with 62 rows and 26 columns
##      aln                      names
## [1] -----ADACRSAS-SRCRSRR----- 1
## [2] -----SADARDSAS-AAARARRSRRS 8
## [3] -----ASAADAAC-RSRRSRS----- 3
## [4] ----SDADAASAAS-ASRRSRSDDS- 31
## [5] --ADSDASACAASC-ASRRRRRS--- 7
## [6] -----ASAAASAC-SRRSARS----- 5
## [7] -----AASASASAR-SRRRARSA--- 6
## [8] ----SAASDSARAA-SRRARRSARS- 9
## [9] --AAASAASAAAAS-SAARSASA--- 12
## ... ..
## [55] --SSSDAAAARAAAASASSRAAAS---- 26
## [56] ---SRAAAARCAAAAASSRARARRS-- 28
## [57] --SARDAARRAAAAASSRRRSS---- 27
## [58] ---SAAAAARASDAADSCRASSA--- 39
## [59] -ASAACAAARASAAACARRARS---- 41
## [60] ---RAASSAARSAARAARRASS--C- 55
## [61] -----ASSAAASAARRSSRASSAAC- 57
## [62] ----ASRSAAAASAARRSRSCASSR-- 56
## Con --??A?AAAAA?A?????R??S?--- Consensus

```

Group 32

```

## use default substitution matrix

##
## MsaAAMultipleAlignment with 55 rows and 28 columns
##      aln                      names

```



```

## [1] ----AARAAASDRARARCASSAAS---- 4
## [2] ----SAAASAADSSAASSASSAAS---- 48
## [3] ---SSAASAASRSAAARAASSAA----- 37
## [4] ----SAASASSDAAASSAASSAAS---- 49
## [5] -----SAACDAAAAAAAASSACDD--- 50
## [6] ----AC-RSASAACSACACSAASAR--- 1
## [7] ----AA-RSASARCRARSSAASSDDA-- 3
## [8] ----AASASASCSAAARRSAAAAD---- 2
## [9] ----AADRSASAAAAASRSAAARSS--- 10
## ... ..
## [48] ---ASRSDAAAAR-RCRSADASAA---- 8
## [49] ---AARASAAAAR-ACRSRSCRRC---- 6
## [50] ---AARSAAAAAR-RARARSAASA---- 5
## [51] ----RASAARAASSASRAASASDA---- 17
## [52] ----SDSAAASASSASRCAASSDA---- 18
## [53] ----SDSAAASASRAASAAAARRA---- 32
## [54] ---ASDSAAASACSAASASA----- 33
## [55] RAACSASAAAASASSASSAAS----- 51
## Con ----??SSAA??AARAAA?A??---- Consensus

```

Group 33

```

## use default substitution matrix

##
## MsaAAMultipleAlignment with 88 rows and 28 columns
##      aln                      names
## [1] ----AADRCRAASAA--SDASRAASR-- 4
## [2] ---SAAARARCASAA--ADA----- 25
## [3] ---SAADDAAAADSS--ADASRCDA--- 30
## [4] ---RSASAASS-DSR--SDARRASSA-- 34
## [5] ---RAAAAAAACRSA--SDARR-SSA-- 88
## [6] ---RASAASAA-ASS--ADRRRASSA-- 35
## [7] ---RRSAARAR-SAS--SDRRAAASA-- 37
## [8] -----ASAADRASA--DRRASADAAAR 29
## [9] ----RDAAAAAADRD--DSRSSADAA-- 72
## ... ..
## [81] ----ASASSRADSAA--RRACAAASA-- 46
## [82] ----ASAADAAACSR--ASACARASA-- 28
## [83] ----AARDAAASDCA--CSSSAA----- 18
## [84] ----AADSASASDCA--CSSCAACDR-- 19
## [85] --RCARASARASARA--CSSCASR---- 20
## [86] --RRAAASASASAAA--ASACAAA----- 63
## [87] --RAAAASARASADS--RAASAAAA--- 32
## [88] --R-AAASARASASA--RRCSAASA--- 33
## Con ---?AAA?AAA?A??--AS???AA?--- Consensus

```

Group 34

```

## use default substitution matrix

##

```

```

## MsaAAMultipleAlignment with 114 rows and 26 columns
##      aln                      names
## [1] -----RAAADSADAADASASSRARA- 2
## [2] ---AADAADRARAAAAAASS-AR-- 107
## [3] ----SAACSARRAAASSSSASSAA-- 15
## [4] ----CAAASDRAARASSASASSRA-- 105
## [5] -----AADSDDRAAASAASASSAAA- 62
## [6] -----AACSDAAAAADAASSSSAAA- 63
## [7] ----SAAASASAAAAASAASASRA-- 17
## [8] ----RAAADASAAAAADRAASRSSA-- 20
## [9] ----SAAAAASAAAAACAAASSAS-- 18
## ... ..
## [107] ----ASSRCSADCDRDARDAASA-- 67
## [108] --RDASSCCAAAAASAASSADA---- 9
## [109] -----SSACAAAAASARSDAAA---- 85
## [110] --R-ASARCAAADARASASDASA--- 5
## [111] --RAASAACDAAAARACASSAA---- 12
## [112] ---AASAARSCA-ARAASRDSAAA-- 70
## [113] ----ASAACSCR-ARARCRASSARA- 71
## [114] ----SSAACSCAAARADSRSSAAA-- 69
## Con ----?A?AA?AAA?????????--- Consensus

```

Group 35

```
## use default substitution matrix
```

```

##
## MsaAAMultipleAlignment with 40 rows and 25 columns
##      aln                      names
## [1] -DAASARSAARAASASSCDAA---- 10
## [2] -DARSDASAARAASASSADACS--- 11
## [3] --AR--ASAASCASSAADAA---- 21
## [4] --RASAAAAARDASSASADSAS--- 12
## [5] --R-RSARAARSACAS-ADCD---- 7
## [6] --RARSARAASSSCASSADSDA--- 8
## [7] ----RASACASSACAS-SDSDA--- 9
## [8] RASCR--AAARAARSSAASDRS--- 13
## [9] --CCRSDAASAARSSAARDRR--- 16
## ... ..
## [33] -----AAASRASAASSSCAAA-- 23
## [34] ----ASSDASSASAASSAAAAARA- 20
## [35] ----RRSRAAAAAASARRSSAAARS- 30
## [36] ----SASRAAASRSARCSRAAASS- 32
## [37] ----RRCRAASASSRRSSRAADCS- 29
## [38] -----AAASASASSSSAAAA-- 22
## [39] ---ARSAR-ASAASCRRRAADASA- 26
## [40] ---SRSARDARARSSRRRAAR-SA- 27
## Con ---?A??AAR?AS?????AA??--- Consensus

```

Group 36

```
## use default substitution matrix
```

```

##
## MsaAAMultipleAlignment with 38 rows and 25 columns
##      aln                      names
## [1] --SRRSCASAAR-SAAR-AA-ARRR 1
## [2] ----RSCAAAARRSAAR-AARARRR 2
## [3] --SRSAAARSAR-AAAD-CARCSR- 3
## [4] ---SRSAAAARSS-SA---ARDASR 4
## [5] ---SRSAAAARSARSAR--ARASSR 5
## [6] --AARAASSAAAAARRR-SARSCS- 18
## [7] -SAARCAS-AAAARSCR-CARSA-- 19
## [8] AAASRRARCCARRRAAA-A--SR-- 30
## [9] -AASRSSADCAARRASA-R--SRS- 33
## ... ..
## [31] -AAD--RACAAASRSAR-R-SARRA 16
## [32] -AAS--RARSAAAARRRS-A-SARAS 27
## [33] -RAACDRSCAAAACD---SSAARS- 14
## [34] -AARCARSDDARARD---AASARR- 37
## [35] --AACARCAARAASC---SARSSRR 36
## [36] --ARCASSAARSASD---SASASSR 38
## [37] --AACR-SAAAAACRD-R-SARARSA 15
## [38] ---ACA-SAAAAARSSRASARARCS 22
## Con -?AA??-A?AA??????-?-?AR?? Consensus

```

Group 37

```
## use default substitution matrix
```

```

##
## MsaAAMultipleAlignment with 101 rows and 26 columns
##      aln                      names
## [1] ----ACAASASDCSDSSDSAASSA-- 1
## [2] ----AAAAARAADCSARSDSRCASAA-- 2
## [3] ----AAAAAASASSSSASAAASA-- 4
## [4] ----AAAAAASACSSSSSAASAAA-- 5
## [5] ----SAAAAASDRSDSDCSARAA-- 38
## [6] ----SAAAAAASSCASDADASARAA-- 39
## [7] ---SAADAACSDSAASSRDASAS--- 10
## [8] ----ASAAACSAASASSRDASASA-- 70
## [9] ---RASDSAASDSAASSSAASRS--- 12
## ... ..
## [94] ----SASASSACSSARARSR----- 18
## [95] ---AAASASAASSSRARSR-ASD-- 24
## [96] ---AAASSSASSASSRARSA-ASA-- 23
## [97] ----ADAASAASSASRASSR-RASA- 22
## [98] ----SAAAAAASSDRDSSA-RADA- 40
## [99] ----AAASAAASSSASSSC-SASRA 33
## [100] ----CAAASAAASSSASSSA-SA--- 37
## [101] ----SCASAAASSSRSDSR-SA--- 45
## Con ---??AAA?AA?????S??A?A?-- Consensus

```

Group 38

```
## use default substitution matrix
```

```

##
## MsaAAMultipleAlignment with 155 rows and 27 columns
##      aln                      names
## [1] --RRAS--ARARAASSAACASSRS--- 26
## [2] --RSAD--ARARAARSSCAARSSS--- 29
## [3] --ARAS--ARARAASASAADASSA--- 27
## [4] --RAAC--AAASASASAAAAASCRA--- 64
## [5] --RAAS--RAASASASARAASSAA--- 66
## [6] --RAAC--ADDASASAAAAAASCA--- 63
## [7] ---SAS--AAAASASCASASAARRD-- 118
## [8] --AAAA--AARASARCAAASCAAS--- 84
## [9] --ARAR--ARRASASAAAAASAAASS-- 100
## ... ...
## [148] --SAAS--RASSDSARCSAASRAA--- 154
## [149] -----A--CASSADACSAAASRAA-- 155
## [150] --SSSA--ASSASSAAAAAARSSS-- 52
## [151] --SSSS--ASCASSSASAARARAS--- 125
## [152] --SAAD--ASSARSSAADAAAASS--- 113
## [153] --SASS--SSSSSSAADAAASASS--- 114
## [154] --SCAA--CSSAASAAACAAAASA--- 101
## [155] --ASSA--ASAAASAAACRAASSA--- 102
## Con --?AA?--AA?????AAAAAA??S--- Consensus

```

Group 39

```
## use default substitution matrix
```

```

##
## MsaAAMultipleAlignment with 168 rows and 27 columns
##      aln                      names
## [1] ---SARRAR-ASAACARASAASAS--- 16
## [2] ---SAASARAASASRADARAAAA---- 155
## [3] ----ARRAA-ASASAAAAAASAAAS-- 158
## [4] -----RARASDAADSRAASC----- 70
## [5] ----AASARASSAAASAAASSARAS-- 143
## [6] ---ARARARASRAAASAR--RAAAD-- 161
## [7] ----AAAAARSRDAASAARCRAAA--- 162
## [8] -----ARAASCDRRSRAASSRRDAS-- 56
## [9] -----ARARASDRRSRAAAASC----- 71
## ... ...
## [161] ----RAAASDADSASRADSRDASS--- 89
## [162] ----AAAACAS-SRSSADSRAASS--- 109
## [163] ----RSAAAAARADSRACSRASASS--- 111
## [164] -----RSAAASCRARRSASRASAAD-- 51
## [165] ----SRSASDRDRARCSCSRDSSS--- 108
## [166] ----CARASSSRSASRASRSSSSS-- 103
## [167] ----ARAASASDRSASDASCSASS--- 106
## [168] ----AARSASDRSAAADASACDSAS-- 105
## Con ----??AA??????????S??AS??-- Consensus

```

Group 40

```
## use default substitution matrix
```

```

##
## MsaAAMultipleAlignment with 162 rows and 30 columns
##      aln                                     names
## [1] ----AASASSAACRAAS--SAASASAS--- 73
## [2] ----AASASSCARAAAS--SAASAAA---- 90
## [3] ----AASAASSACCAAS--SCASAAA---- 47
## [4] ----ARSCSSSARRAAS--SASASAA---- 79
## [5] ----ARSARSSAARAAA--SRAASDA---- 81
## [6] ----AAAASSASRAAS--RAAA----- 48
## [7] ----AASASAASAAAAS--RAAAASAA--- 74
## [8] ----AAAAASSASSAAS--SAAA----- 49
## [9] ----RAAAASDASSAAS--SASSSSC---- 105
## ... ..
## [155] ---ARAASRSSAADAAD--RSSSDD----- 57
## [156] ARRARAACRCSAADA----RASSS----- 129
## [157] ---AARSASSCA-CAAD--AASSSDA---- 54
## [158] ----ARSADACADSAAA--AASSSAA---- 62
## [159] ---AASSSSSDAAAAAA--SSSSRA----- 55
## [160] ---AASSSSSDADCAAA--SASSRA----- 56
## [161] --AASASRASRAAAAA--S--SSAS---- 64
## [162] ---AAACRASASAAAAS--SSASSAS---- 101
## Con ----?AAA??A??AA?--??SS?A?---- Consensus

```

Group 41

```
## use default substitution matrix
```

```

##
## MsaAAMultipleAlignment with 66 rows and 30 columns
##      aln                                     names
## [1] -----AASASSRSARAAADSDSRD---- 1
## [2] -----AAASASASCSAAAAASSSAR----- 3
## [3] -----AASASARCAARDAADSSAAS---- 7
## [4] -----AASASSARRARSAASSSA----- 34
## [5] -----AAAAADACARAAAASRARS---- 5
## [6] -----AASSASSDARRRARAASASR----- 35
## [7] ----AAAASARASRAAAAASSSRA----- 4
## [8] -----SAASARASRAAAAARAARSAS---- 20
## [9] ---SAAAARASRADDAARSACS-A----- 16
## ... ..
## [59] -----ASARSSARSRAAASAADSCR--- 41
## [60] -----ARARSRARDRSASSA---C---- 49
## [61] -----ASAASSARSRADCSA---CRRRA 40
## [62] -----ACAAR--SSAARSDRSASRACD--- 48
## [63] -----AACAAAASSRSRRDCSASRA----- 53
## [64] -----AAASASSAARSARDCRASAA----- 54
## [65] -----AAAAASSAACDADRADADAS---- 60
## [66] -----CAASASSSRCACASRSAS---- 66
## Con ----AAAA?A??A??A??AA??A---- Consensus

```

Group 42

```
## use default substitution matrix
```

```

##
## MsaAAMultipleAlignment with 105 rows and 25 columns
##      aln                      names
## [1] -ACASAAAAASASAACASA-SA--- 101
## [2] --CAASAASDSASAACASARSA--- 102
## [3] ---AASAAAASSSSASAARSAS-- 1
## [4] --AARADAAASASAASARASAA--- 48
## [5] ---AASAASAAASARAASAAAAA-- 95
## [6] -SAAASAASCASSAAACDAAA---- 104
## [7] --AAAAACADSAAACASSCCRS--- 22
## [8] -RAAAASCAASAACCASDAAA---- 105
## [9] -AAAAASSAAAAACASAASA---- 30
## ... ..
## [98] --AASSSSAACASR-SSAARRA-- 76
## [99] --AASSSSARASARASSAARSS-- 77
## [100] --AAASAAAAASASASSDAARA--- 73
## [101] --AACSDAARRCR-ACADSARSA-- 69
## [102] --AAASCAARRRAAACSDSARS--- 70
## [103] ---AASASCACRSACAASSDRRA-- 80
## [104] ---AASARAAAAASACCASARRRA-- 81
## [105] --AAASAAAAAAARCCRSSARR--- 83
## Con --AAA?AAAAAAAAA?????--- Consensus

```

Group 43

```
## use default substitution matrix
```

```

##
## MsaAAMultipleAlignment with 22 rows and 23 columns
##      aln                      names
## [1] -SRRAASSCSRAASSAASSSS- 9
## [2] -SACRAASSSSASSSSAACASS- 10
## [3] -SRAAADRSSRRSSSAACSS-- 1
## [4] -SSRAASSSSRRSASAACSAS- 7
## [5] SACARARRSSSSASSSAASS-- 11
## [6] -SCAASSSSSSASASAASS-- 12
## [7] -SAAAAAASSSRARCADASS-- 14
## [8] ASSAAAASAAARSSARCARSS--- 15
## [9] -SRAAADAASSSSASAAASDS-- 2
## ... ..
## [15] --SSRAASASRRSSSDADSRSS- 22
## [16] --SRRCDARSSSSAASAASSSA- 3
## [17] --SRRADADSSDDASAASS--- 4
## [18] --SRRRAASSSCSRSSRASDSS- 8
## [19] --SSRAAASSRSASACSDAASD 5
## [20] --SSSAARASSRAADACRDASS- 19
## [21] -SSARCARRSSRASRCCRDSS-- 16
## [22] -SSRRARASSAASAAASASS-- 20
## Con -SSARAA??SS??S?AA?SS-- Consensus

```

Group 44

```
## use default substitution matrix
```

```

##
## MsaAAMultipleAlignment with 16 rows and 25 columns
##      aln                      names
## [1] SSSAAA-RARR--SSAARRCAS--- 5
## [2] -SSRAA-RARRDSASAARRRAS--- 6
## [3] SCRRAASRARR--AAARRRRAR--- 4
## [4] SAASAA-RASR--SACRRRRARA-- 10
## [5] SSSARA-RASS--AAARCRRRARS- 8
## [6] SSSARR-RASA--SAARRRRARR-- 9
## [7] -ARSRR-AASA--AAARRRDARRS- 15
## [8] -RACRRARSAS---RARARARRSR- 2
## [9] -SACRRD-SAS---RARDRASSRA 3
## [10] -RSRSRARSDA---DRRCRRRASS- 13
## [11] -ASCSRAAASS---ACRRDRAARS- 11
## [12] -SACSAAASRS---AARRDCACRS- 12
## [13] -SSSSAAASS---SARRRRARRAS 7
## [14] SRSRARSAD---SSAARRARA-- 14
## [15] -RSRAACRAAR---ASRRRRARRR- 16
## [16] -AADRRCDSDS--RASRARAAAA-- 1
## Con -?S??R?RA??---AARRRRAR??- Consensus

```

Group 45

```
## use default substitution matrix
```

```

##
## MsaAAMultipleAlignment with 101 rows and 27 columns
##      aln                      names
## [1] ----RAASASSDSRRCRCSSASSACS--- 1
## [2] ----RASDSSRSAR-RCSARAR----- 34
## [3] -----SAAAADSRRCRAAAAASARAS-- 25
## [4] -----SSADADSRRASAAAASAAAS-- 28
## [5] ----RSAARCASSRRRAAACSAAS-- 12
## [6] -----SSARAASAAASSACSARDSA-- 20
## [7] ----AASRRSRSAAADSAAARDS--- 46
## [8] -----ASAASACSASARSSC-- 82
## [9] ----ARSRRSARSADSADASAR-AS-- 47
## ... ...
## [94] ----AASAAASACASRACARSSDC--- 81
## [95] ----SASASSRADARRASRSS-SR-- 4
## [96] -----SSAACADRARAAAASASASAS- 26
## [97] ----SSSSASCARDARAACSARSS--- 32
## [98] ----DAASAASASRARRARSASSD--- 8
## [99] ----SAASSRCAARASASSRR-RS-- 29
## [100] ----SSSSSDRASARSASSRR-RS-- 30
## [101] ----SASSRSCSDRRSACSARSRR-- 31
## Con ----??S?????AA?A?A?????--- Consensus

```

Group 46

```
## use default substitution matrix
```

```
##
```

```

## MsaAAMultipleAlignment with 14 rows and 23 columns
##      aln                      names
## [1] -DAAASSSAADDASDRAAARS-- 10
## [2] --ASASSADRCADRAAAARAR- 12
## [3] --SSAASSARASRRAAAARAC- 13
## [4] -SSSSAAACRASRA-AAAAARAS- 14
## [5] SRASASSCACASRS-SARARA-- 4
## [6] RRRASDRCAAASRS-SAAAAA-- 5
## [7] ADADSSCASASRD-RRAAAA-- 3
## [8] -ACSSAS-SAACAAAARARAAC- 6
## [9] --RSDASRSDASAAAARARAAC- 7
## [10] AARSD---ADSSDAACARRAAA 8
## [11] -ARSDSS-AASSDSAAAARRAC- 9
## [12] ASSSSARRDAASADRRRAARS-- 11
## [13] -RDRSADAACASARSSADARS-- 1
## [14] -RS-SASAACASARRDARRSAC- 2
## Con -??S?AS?A?ASA??AAAAA?- Consensus

```

Group 47

```

## use default substitution matrix

##
## MsaAAMultipleAlignment with 93 rows and 27 columns
##      aln                      names
## [1] --SRRA--SAS-ADR-ASDRADSSA- 26
## [2] --ARSRA--SAA-ASRDSASRADSA-- 28
## [3] --SSRRA--DAA-ASRASAARSSAD-- 33
## [4] ---RASD--RAA---AASCASASSD-- 39
## [5] ----SSR--DAA---AASCASASSA-- 41
## [6] ---RSRA--RAA---RASCSSASSA-- 40
## [7] ---SSSS--DAARSRAASCASASSS-- 42
## [8] --SS-AD--SADSDADASASAARSDA- 35
## [9] --SSRAR--SAD-DARASAAAADSD-- 36
## ... ..
## [86] -----AS--ASDAAACAAAAARAA--- 5
## [87] --ADRAS--ASARAACASAASRSA--- 17
## [88] ---AASS--AAAAAASASAASRDRR-- 44
## [89] ---SARS--AAAAAACASAARRARA-- 45
## [90] ---RSAS--SCARAAAAASRARSAA-- 8
## [91] -SARSAS--ACARCASSAAASRSA--- 16
## [92] --SCSSS--SSDRAAAAADAASRRA--- 11
## [93] --SASAS--SSARSAAADSASSSA--- 69
## Con --?????--??A?AA?A??A????--- Consensus

```

Group 48

```

## use default substitution matrix

##
## MsaAAMultipleAlignment with 121 rows and 28 columns
##      aln                      names

```





```

## MsaAAMultipleAlignment with 179 rows and 28 columns
##      aln                      names
## [1] ----SRS---ARSAASRASSSSCAAAS 31
## [2] ----SRS---AASSAARAAASRAAAD- 47
## [3] ----SRS---ARSAASAASCAASASR- 32
## [4] ---ASDA---ARAAASRAASCAASAA-- 113
## [5] -----RSD--ARSAARRASSAAASASA- 94
## [6] ---AARSA--ARSAARRAAAAARRS-- 141
## [7] ---SRRSS--ARAAASRASAAAARS--- 140
## [8] ---SCRAA--ARDAASRAAAAAARSS--- 142
## [9] -----ASA--ASSAASASSAARCSA-- 100
## ... ..
## [172] ---RRSAR--RAASRDRCARASRSR--- 148
## [173] ---AR-RS--AAASAARRASASAD-- 145
## [174] -SRA-SSC--ARAAAARA-SDASAS--- 131
## [175] -SRA-SSA--ARAAAARARSRAAS--- 132
## [176] --RARSAC--ARARSRRS-ASASAS--- 146
## [177] --SA-SSA--DAAARARA-SDAASS--- 136
## [178] --SARSSA--AAAARARR-SAARSS--- 137
## [179] ---DRSRR--ASAARARA-SAAARSC-- 138
## Con ---???S?--A?AAAA?AAAAAAA?--- Consensus

```

Group 51

```
## use default substitution matrix
```

```

##
## MsaAAMultipleAlignment with 30 rows and 25 columns
##      aln                      names
## [1] -SASACASAASADAARCRACR---- 8
## [2] -SRSACASAASARAS-SRSCAR--- 9
## [3] RSCSASAAAAASSAAAAARASA---- 20
## [4] --SSCADARAAAAARARACRA--- 1
## [5] -RRSSCSAASSASDAAR-ASA--- 21
## [6] --RSCASAASSSASAARSASA--- 22
## [7] -ARASCSAADSSSAARRSAR---- 23
## [8] --ASSCSAADSSS--ARRDARARA- 24
## [9] -ARSC-AARDSSAACSRRCDS--- 29
## ... ..
## [23] --CASAASAA-DASARRAAASAA-- 11
## [24] -SASAAASAA-DACARRAAAAA--- 12
## [25] ---AACASSA-SASARRAAAAASA- 15
## [26] -----SSSSSR-SAAARRAASAASAA 17
## [27] --RCASDDSD-AASSSAAAA-ASA- 19
## [28] -----ARDDCD-SASASAAAAARAAA 28
## [29] -SRSAASSSASAARASCRSASD--- 7
## [30] -RSSSCRSSADSASADCRRRS---- 25
## Con --?S????A???A?A?R?AA???-- Consensus

```

Group 52

```
## use default substitution matrix
```

```

##
## MsaAAMultipleAlignment with 66 rows and 24 columns
##      aln                      names
## [1] -SSASRSARARCAACAAAAAAS-- 1
## [2] -SSASRSASRSCAR-DAAAAAAS-- 2
## [3] --AACARRSRASAARAAACAAS-- 27
## [4] -RARCRRSRRASAAAASAAAAAAS-- 29
## [5] -SDSARRRRSASAARSAAAAASS-- 30
## [6] -SASARRRRSSSAASAAAAAAA--- 31
## [7] --SSARDARRSASSRCARARAAA- 5
## [8] ---SSRACRRRASSRAAAAAAAA- 37
## [9] ---SCSACRRADRARAAAACSDA- 8
## ... ..
## [59] ---CRS-SASRRARSAAAAASA-- 26
## [60] ----AR-CSARRAASAARRAS--- 25
## [61] RDAASA-CSARSAAAAAAA--- 41
## [62] ---AAS-ASASAAAAARAARAAAR 49
## [63] ----AR-ASASADAAARSAAA--- 51
## [64] RSSAARSASAAADAAARAAAS--- 58
## [65] DSSDAS-ASAARAAAAARAASAS-- 59
## [66] RRSSAS-ASARDAAAAARAAAS--- 60
## Con  --???????A???A?AAAAA?-- Consensus

```

Group 53

```
## use default substitution matrix
```

```

##
## MsaAAMultipleAlignment with 83 rows and 26 columns
##      aln                      names
## [1] ---SAA-SARCSASARAAAASRASS-- 68
## [2] ---SAA-SRRSSASAAAAASAASS-- 69
## [3] AARSAC-SARSSDSARCAAAAR----- 2
## [4] --AAAA-SRRRSSSASADAASAS--- 71
## [5] --SAAC-SRR-SSSASADASSASS-- 72
## [6] ---AAC-ARR-SSSAAAAASAASAAS 70
## [7] --SASR-AAR-SSSARAAARCASC-- 29
## [8] ----SA-SSAARSSSAASAAAACAR- 31
## [9] ---DAA-SRACASASAASADAASA-- 75
## ... ..
## [76] --SAA-RDSSRAASASAAAAAAS--- 50
## [77] --CAA-SCSSRCAAAAAAASADS--- 78
## [78] --ARRSRSSRSRRAAAADRSS---- 35
## [79] --ARRSRSSRSRRAAAASCASS---- 36
## [80] --DDRRRSSRSRACASADAADS---- 46
## [81] -SDCARDSSRSSR-ASADAAAA---- 47
## [82] -----ACSSRASRA--ASASAS---- 81
## [83] ---DARCASRASRASDAASASS--- 82
## Con  --????????????AA?AAAA?--- Consensus

```

Group 54

```
## use default substitution matrix
```

```

##
## MsaAMultipleAlignment with 68 rows and 25 columns
##      aln                      names
## [1] --SSRC-SSR-RASCASSASAASS- 1
## [2] -SSSSS-SARARASCASSASAA--- 2
## [3] --ASRS-RARASSSCADSAAAARR-- 35
## [4] --ASRS-SARADASAASSAAADA-- 36
## [5] -SSSSS-SAASAASACAAAAAAA--- 8
## [6] -SSASS-SSADASSACSSAAAA--- 9
## [7] -SSSAA-SRASSCRSAAAADAA--- 46
## [8] -SDSAS-SARAAAAACASAAAA--- 10
## [9] -SASAS-SACAAADRCSSAARAS-- 26
## ... ..
## [61] -SRASRSAAARAACSDASAAA---- 29
## [62] -ASSRSARAAAACSDAAAAD---- 34
## [63] -RSSSARAADSAAASDSAAAAAS--- 32
## [64] -ASSSCAAADSAASSDSAAAA---- 33
## [65] --SSSARSCSSAASRSARSAAD--- 48
## [66] --SSSDASCSSAASSAARAASA--- 49
## [67] --SSRADSCSSAASSACAAAAAR--- 50
## [68] CSSSSADSRSSRASSDAAAA----- 51
## Con -SSSSS-S????S????AAAAA?--- Consensus

```

Group 55

```
## use default substitution matrix
```

```

##
## MsaAMultipleAlignment with 112 rows and 24 columns
##      aln                      names
## [1] -SSRRRAAASCSSSDSDSASAA-- 3
## [2] --SD--AASSCASSDSAAASAACA 99
## [3] -ASD-AASSDCRRSDSSAASAA-- 30
## [4] --SSRASRASARASDSSASSAA-- 23
## [5] -ASSCASRASAARS-SSAASAA-- 57
## [6] --ASSCACRSDRSRSSRACSAA-- 56
## [7] --ASRSDCASRDASASRASSAA-- 71
## [8] SAASSCAASSDSASSS-SRAA--- 69
## [9] -AASSAAASSDSCSRSSAA--- 70
## ... ..
## [105] -ASSRRARRRRSSSCSDDSAA--- 4
## [106] -ASSR-ARASRSSSCSADAASSS- 5
## [107] -ASAAARADA-ASASSSRAASA-- 11
## [108] -CASARSRARASRSSAARAAS--- 87
## [109] -DS-ASASCRSSSASASSSDAD-- 65
## [110] -AS-AARSARSSSASASRDDAD-- 66
## [111] -ASRAAASCRASSRAASRRDA--- 64
## [112] -ADSADSSDRASARSASS----- 59
## Con --SS?SS?????S????AAA?-- Consensus

```

Group 56

```
## use default substitution matrix
```

```

##
## MsaAAMultipleAlignment with 116 rows and 27 columns
##      aln                      names
## [1] ---SARSSASASRARACAASRRS---- 60
## [2] -----SSASASSCRASAASSASSASS 102
## [3] ---CASDDSAASSARASAASRSD---- 2
## [4] ---SSSAASSRAARAAADSDAS---- 44
## [5] ---SSRSRASARAACAAARSSAS---- 111
## [6] ---SSSSASSCAAAAASCARASS--- 22
## [7] ---SSRSSASRDARAAASSRRAS---- 62
## [8] ----DSSASRCDAASSCARCSSSA--- 86
## [9] ----SSRSSADRASSSARASDSA--- 96
## ... ..
## [109] --SRRSSAADSCRRCRASS-CS---- 58
## [110] -RSTRSSARDSCRASSAASS-CS---- 59
## [111] --SSRSSAASSCRSRRRAASDDAS---- 27
## [112] DSSASRSAASSCASSDAASA----- 91
## [113] DSSRDSARAACARSASASA----- 92
## [114] --SSRRSRARSCAASAARSASA----- 109
## [115] ---SRRSRARSCAASAAARSSSS---- 110
## [116] --DSSRSASSSCASSAARASAA----- 90
## Con ---??SS??SS?A??A?S??---- Consensus

```

Group 57

```
## use default substitution matrix
```

```

##
## MsaAAMultipleAlignment with 68 rows and 27 columns
##      aln                      names
## [1] --SSSS--SAAAADCRSAASASAS--- 41
## [2] ---SAS--SSRAASCRSARSASAS--- 42
## [3] ----AS--S--AARCRSAARASAS--- 9
## [4] --RASS--AARAAAAACARAACRS--- 22
## [5] --AAAS--SRAAARSASRDAARSA--- 10
## [6] ---ASS--SR-AARSRARCARS---- 12
## [7] --RSSA--ASAADAAR-AAADRSS-- 30
## [8] --SSSA--ASAARASRSAAAARSS--- 31
## [9] DSASAS--ASAACASR-SAASAA---- 35
## ... ..
## [61] ---AAA--SCASRARASAASDRADR-- 55
## [62] ---ARS--AAAAASRAAAAAASARR-- 16
## [63] --SSCA--ARASASARSRAADSAA--- 67
## [64] --SSAA--ARASASACASAAARAA--- 68
## [65] ---ADA--AAAAASASASARSRADR-- 21
## [66] ---ARA--ARARASASRSRAARSDS-- 1
## [67] ----SC--AAARASASRADSARACAC- 62
## [68] ---AAA--AAARA-ASDASAACSDSD- 14
## Con ---A?S--A??A?A??A?A??-- Consensus

```

Group 58

```
## use default substitution matrix
```

```

##
## MsaAAMultipleAlignment with 43 rows and 24 columns
##      aln                      names
## [1] -RSDA-AAARRSSDRASAARAA-- 1
## [2] -SSDS-ASASSSSCAASAARAA-- 2
## [3] ---AA-ASASSSSACARAARACSS 18
## [4] RSCRA-SSSSRSSAAASAARA--- 7
## [5] ASARARSSSARSSAAAS-ARA--- 8
## [6] --SRDAARSSSAARAASAARAA-- 3
## [7] ---RSRARDSSSSRRASADSAA- 10
## [8] -RSRCCADSSSSRRAARSARD--- 9
## [9] ---ACARDSSSSARRARAARARR- 17
## ... ..
## [36] ---RARCSSSADARSRDAACRAA- 30
## [37] ---RSRASSAAARR-CSAACSARA 4
## [38] --R-SSRRASACSRRCRRAAARA- 5
## [39] --RASSARSAAASRRCRRASAA-- 25
## [40] CDASASSSSDSSAR-CSRAACS-- 15
## [41] SDAADASSASSARRRSRAA---- 16
## [42] ----AAASSASAARAASARCASAA 26
## [43] ---SAAARSASAASDCRARSADA- 41
## Con  --??A??S?S?S?RAA?AA??-- Consensus

```

Group 59

```
## use default substitution matrix
```

```

##
## MsaAAMultipleAlignment with 65 rows and 24 columns
##      aln                      names
## [1] --AAADAAS--RAASSADSAS--- 17
## [2] ---AAAADS--RAASSAASAC--- 18
## [3] --SDADADSSARASDSAASASC-- 16
## [4] --RSADAASDARAASSAAASAD-- 15
## [5] -DSSAASDSDSSAAASADASR--- 39
## [6] -SSAASRSDSSAAASAAAAS--- 40
## [7] -CSSASDSDSSACASARRDS--- 38
## [8] -SDSAASDSSAASSARARSAA--- 31
## [9] --SSRARDSCSAASAARRARRS-- 23
## ... ..
## [58] --AAAASADASDAASRASSDAS-- 20
## [59] --SRAACADSRDCAARDSSSAD-- 21
## [60] --CASAASSSSAADDARAASA-- 33
## [61] --SASAASAASDRSSSARAASC-- 41
## [62] RRRASAASSSSASARRSRAA---- 56
## [63] SSRASAASASSSSARSSRAA---- 57
## [64] ---SAASSSSAASAASSAAAASC- 42
## [65] --CSASASDSSASARSSRAAS-- 44
## Con  --??RAASS??A??S??AA??-- Consensus

```

Group 60

```
## use default substitution matrix
```

```

##
## MsaAAMultipleAlignment with 32 rows and 26 columns
##      aln                      names
## [1] ----RDSRCASSRAASSSRDSCSA- 1
## [2] ----RRSADSASSDAASDSADS-SA- 4
## [3] ---RARAADRSRSSAARSSSSS-D-- 6
## [4] ---SSRRADRASSAASASSAS-D-- 7
## [5] ---RARSAD-SASSAAAASACS-AA- 5
## [6] ---CCSARSSARSCASASSSSASA-- 9
## [7] ---CSRDRSSSRSSRSSSSSSAA--- 12
## [8] --SSSACRSSRSSASASSASSA--- 11
## [9] --SSARSDRSSRSSRSSSSASS---- 13
## ... ..
## [25] ---SRASASS--RASRRRCSSSA- 18
## [26] --RCRAARSSR--AARSRSSSA-- 3
## [27] ----RCSACSRARASSSASSASA-- 2
## [28] ----ARSAAACRASADSSSRRCRS-- 19
## [29] ----RASAASCAARADSSSSCRS-- 21
## [30] ---DRASAARCAA-ASSSSDSRS-- 20
## [31] -----CSASADRSAASSSRASCS-- 25
## [32] ----RCARSARASDASASSSDADSA- 27
## Con ---???S??S?R?SA?SSSSS??-- Consensus

```

Group 61

```
## use default substitution matrix
```

```

##
## MsaAAMultipleAlignment with 111 rows and 26 columns
##      aln                      names
## [1] ----AASASCSSAAASRASSSASA-- 8
## [2] ----AASASCSSAAAAAASSDSAS-- 68
## [3] ---SAASASC-AAAASDASSSAA-- 9
## [4] -----AASAASSAADACSSSSSASA- 92
## [5] ----SAASASSSAAAACRSSSAS-- 93
## [6] ----AAASACSADARRCRSSSAS-- 91
## [7] ---AASASSCAAAAAASRDSSAS-- 51
## [8] --RSDAASARSSSSAA-SSADAS--- 23
## [9] ----AAASARSRSSAA-DSAAASSA- 59
## ... ..
## [104] ---DCRRSSSSASARAARSAAAA--- 40
## [105] ----RARSASRASARARRSAAASS-- 41
## [106] ---SAAASSSSASARARSAS----- 39
## [107] ----RAASARSSARARASARSCD-- 108
## [108] --CARCASAACAAASARRSAAS---- 42
## [109] ---ARSDSSASRAASARRCSASAS-- 43
## [110] -----CARASSCSCDAAASSDAAAS- 50
## [111] ---AACRRAASRSCDSSASSDRD--- 71
## Con ---?A??SA?????A??SS?S?--- Consensus

```

Group 62

```
## use default substitution matrix
```

```

##
## MsaAAMultipleAlignment with 102 rows and 28 columns
##      aln                      names
## [1] -SSARCADSSARS-RSA--AAASA---- 29
## [2] -SSARSASRSAAS-AAA--AAARA---- 73
## [3] -ASRDSASSAARS-AAS--AAASAA--- 7
## [4] -RSS-CSARDAAS-AAR--SAARA---- 14
## [5] -RSS-CSCRASSS-ASS--SAASAS--- 56
## [6] -R-RDSRSRASSS-SAA--AARAAA--- 45
## [7] -S-RDSRSARSSS-CAS--ASAAAA--- 102
## [8] -R-ACCRASSASS-SAS--ASRASA--- 57
## [9] -R-ASARAASASS-RAS--AAAAAAA--- 99
## ... ..
## [95] ----RA-SRRSRAAASDRDASASSR--- 64
## [96] ---SRSRSTRADSCASS--ASCSAD--- 66
## [97] --RSTRRCRRASSDSRS--SAC-AD--- 68
## [98] --ASSSDARDASAARSA--SRSSA---- 13
## [99] ---RASRCRCAAARRSA--SRASAR--- 65
## [100] ---RSC-AARCASASSA--ARASRAA-- 54
## [101] ---ASR-AARAARSSAA--ARASCAA-- 85
## [102] ---RSCRASRCAAASA--ARASAS--- 55
## Con ---????????S??A?--??A?A?--- Consensus

```

Group 63

```

## use default substitution matrix

##
## MsaAAMultipleAlignment with 21 rows and 24 columns
##      aln                      names
## [1] --DASARRRSRASAARASRAADD-- 5
## [2] --DRSRAARSSSAARACCADD-- 7
## [3] --SRRRRRASSSAARAAARADD-- 8
## [4] -SDAARDASSARACSASCAAD--- 1
## [5] --AR-AAAASSRASSRSARAASR- 11
## [6] RAAR-ASSDAARADSRRARAA--- 18
## [7] AAARCASSRASRA-SRRASAD--- 17
## [8] --AACACDCASSDRSASSASDD-- 4
## [9] -DAARARDSASAS-AAASRRDD-- 6
## ... ..
## [14] ---SAAAARCSAASSRAAARAA- 19
## [15] --DAAARARASSASSRCCACA-- 13
## [16] -SCDAAAARASSR-SSRRAADA-- 12
## [17] -SSAAASRAASSDRASRAAAR--- 15
## [18] SSCAAASARAASDRSSRAA---- 16
## [19] --CADACARSSSSCSASRAASA-- 10
## [20] --SDAADASSASARSAAAASCS-- 2
## [21] -CADARRCDCASDRSACSAAC--- 3
## Con --??A??SSSA?S??AA??-- Consensus

```

Group 64

```

## use default substitution matrix

```



```

##
## MsaAAMultipleAlignment with 119 rows and 26 columns
##      aln                      names
## [1] ----CCSAASSSSADRSAAAAARA-- 21
## [2] -----SSAASSRSDSSAAAAAAA-- 38
## [3] ----SSSSAASASCSDRAAAAAAAS-- 30
## [4] ----SSDSRASRSSSASAAARARS-- 34
## [5] ----SSSDSASRSSASSARAAAAS-- 35
## [6] ----ASASASRRSSSSSACAAARS-- 36
## [7] ----CSSASARSSSSSACRAACA- 47
## [8] ----SSASASCSDSSSSSAAAAAA-- 37
## [9] ---RSSAAASRSSSSASAACCAR--- 42
## ... ..
## [112] ----SSACSSSAACAASAACSSAA-- 73
## [113] ---SASAASASSASSAA-ASSSAA-- 88
## [114] ---SASRASSAA-ARCARASDAS-A- 1
## [115] ---SSSRACSSA-ARAARSSAAA-A- 2
## [116] ----AAAADSSARASCARASRSR-A- 49
## [117] ---SAAAADSAA-SRCSRSARSA-A- 50
## [118] ----SSASSSAS-DRSSRDCRSSDA- 71
## [119] -----ASAA-DRSSRRSASARA- 82
## Con ----???S???S???????AAA?-- Consensus

```

Group 65

```
## use default substitution matrix
```

```

##
## MsaAAMultipleAlignment with 55 rows and 24 columns
##      aln                      names
## [1] RSSASSCA-RRASASAAADAA--- 25
## [2] -SSASSAA-CRASSAADRAA--- 26
## [3] -SSASSAR-RRRSCSAAAASAAA-- 24
## [4] -SDSRAAA-RRASADASASAAA-- 1
## [5] -SDSRAARDCSAAASSSAAAA--- 2
## [6] -SSAAAARSRAAASSASADAA--- 27
## [7] --SASSAACASSRAARSAASAS-- 5
## [8] --SSRSAAAASSRRAASSAAAS-- 7
## [9] --SAASSRARRSAAAASSASCA-- 49
## ... ..
## [48] --RCDSSAARSARASSRSARR-- 4
## [49] ---ASSAARASRSRARRSASRSS 18
## [50] ---ASAAAAAAAASCARSSSAA- 10
## [51] --RASRSAARARSSRSDSSA-- 21
## [52] --SCSRASSRDAASRSRSASRA-- 12
## [53] --SCSSAARAASRSAAASSRSSA-- 17
## [54] --ASSAARRRASRSASSRSSA-- 20
## [55] --ASSRRARRSSRASSASRSSA-- 19
## Con --???????R???????AS?A-- Consensus

```

Group 66

```
## use default substitution matrix
```

```

##
## MsaAAMultipleAlignment with 22 rows and 27 columns
##      aln                      names
## [1] --CASRDAASSSSSA-SRSSRAS---- 13
## [2] --CASSDAARSSSSA-SASSAAA---- 14
## [3] ---ASRDAASRSARSRSSAAA---- 6
## [4] --CAARDARRASCRA-RRSSAAA---- 5
## [5] --CAACAADSASASA-SSSCAAA---- 9
## [6] --SASSDARSASSAR-SRSAAAA---- 7
## [7] -----RAAAAAAAD-DSARARSCAAA 8
## [8] -----RCAASDASD-ASARAA----- 18
## [9] --SCDARAAAASSSS-ADASAAAA--- 11
## ... ..
## [15] -----DASDASASS-SSARAASARAA 15
## [16] -----CARADACCSCSSRSRAAAAA-- 1
## [17] -----ARADASCASSAAAASAAARA- 2
## [18] ----RSRAARDSCSASRRSCDARA--- 3
## [19] ----SAAADSCSASSRRSSASAR-- 4
## [20] ----SSAAAAASCASASSSSAASA--- 10
## [21] ----RRAARADCAS-SSSSAAAA--- 20
## [22] -----RADDAAASAS-SSSASRAA--- 16
## Con ----???AA?AS?SA-S?S?AAAA--- Consensus

```

Group 67

```
## use default substitution matrix
```

```

##
## MsaAAMultipleAlignment with 71 rows and 27 columns
##      aln                      names
## [1] --ARADSAASAADARRAASASA----- 32
## [2] ---R--SSRDAADARRAASSSA----- 66
## [3] ----ADARAAARDRRRAASAAACS--- 31
## [4] -----CRSADARSSASAAAA----- 50
## [5] ---SRASRCDSADARSAASSASA----- 67
## [6] ----RRAASACDRRACSCAAAAAS--- 24
## [7] -----SARSDAARDACSCRAAAA---- 43
## [8] -----AASDASSAAASCAAAA--- 49
## [9] ----CRSSAAASDSSAADADSAAA--- 65
## ... ..
## [64] ----ADDSAAARDSASSSAARAAAA--- 41
## [65] -----SDARAAAASCASAAAA----- 54
## [66] ----RSAAADDSACSRRSADAAAA--- 63
## [67] ---CRSAAAADSR-DRSRADDAAA--- 64
## [68] ----ASAAAASAADACRASDAAAS--- 6
## [69] ---CRADAARSCSADASAAARAA----- 39
## [70] ---CRASAASDDSCRRAADARAA----- 62
## [71] ----RRAAARCSAAASDAADRAAD--- 40
## Con ----????AA???A????AAAAA----- Consensus

```

Group 68

```
## use default substitution matrix
```

```

##
## MsaAAMultipleAlignment with 101 rows and 32 columns
##      aln                                names
## [1] --ARCSRAASCSDSS---RASSAAA----- 9
## [2] --DRSS-AASCAASS---AASSAAAA----- 18
## [3] -----SAADSCARRS---RACASAADAA---- 34
## [4] -----SRRDSCARSS---RAAAAASDAR---- 36
## [5] -----SASARSARAAS---CSSAAAAAAA----- 29
## [6] -----SSSARSSDCAD---SSSASAAAA----- 52
## [7] -----SRDSSDAAS---SRSAASSAA----- 4
## [8] -----SSRSSR---RSAASASASASAAA 13
## [9] -----D--CARSAS---RSAASSSA----- 70
## ... ..
## [94] -----CSASR---SCSSAASSAC---- 69
## [95] -----AARASACRS---AASSAAAAAAS--- 78
## [96] -----ARDACSASS---ASASAAAAAAS--- 86
## [97] -----RSDARADRS---SCSARSSAAAA--- 41
## [98] -----ASAARASRS---CCSARAAAAASA--- 66
## [99] -----CAASSDRSARS---SC---RASCAAC-- 56
## [100] -----ASSRRSARS---SCCAARADCAA--- 57
## [101] -----ARSACRARA---SCCSACASCSA--- 61
## Con -----?????????---?A?AAAAAA?---- Consensus

```

Group 69

```
## use default substitution matrix
```

```

##
## MsaAAMultipleAlignment with 86 rows and 32 columns
##      aln                                names
## [1] -----SSASSA----RARCSDAARAARS-- 71
## [2] ----RRSAARSS----RARCSAASRSA---- 85
## [3] ---ARCASASSS----RSRRASAAASA----- 21
## [4] ----AASDDRSA----RAAACARCRDSC---- 44
## [5] ----AASSASSA----RASACAAACASA---- 82
## [6] ----ASARDSA----SSASARRARSASA--- 24
## [7] ----ASAASSA----ASARARRRSASR--- 25
## [8] ----ARSAASS----AAARAARRASAAA--- 1
## [9] ----CARACSRC----SDSSCRAASR-SR--- 52
## ... ..
## [79] ----RAARASSR----AACDSRA-ASRSA--- 86
## [80] ----SASSACR----AACDASR-ASSRDA-- 68
## [81] -----AAASAR----AARDSS-AASSDAD- 72
## [82] ----SARDSARSRDSAARASSA-AAS----- 76
## [83] ----SA-ASAR---SAARDSSA-AACASA-- 81
## [84] -----AADS-----SRRRCSSAAASSDADS 77
## [85] -----AADS-----AARDSSDRAASADAAS 78
## [86] -----RARSSR----AARSSSARASSADR-- 73
## Con -----A??????---????????A??A?--- Consensus

```

Group 70

```
## use default substitution matrix
```

```

##
## MsaAMultipleAlignment with 62 rows and 23 columns
##      aln                      names
## [1] --AAAADRASSAASCRASAARA- 53
## [2] -SSAAARRARSAASSAASASR-- 61
## [3] --RASAAAARSASSAAASASRA- 56
## [4] --SAAAAAARSASSAAASAARA- 57
## [5] -SAAAASSACADAASAASAAA-- 13
## [6] --RAAASSSCSAACASASAAAA- 1
## [7] ----SSASCSSASAAASAASA- 35
## [8] --RAAASADSCSAAA-ADAASSS 48
## [9] -ARAAASASSASAAADADSASS- 49
## ... ..
## [55] --SRARSAASSAAARSASASRA- 23
## [56] -SSDADA-SSSASACSSARAAA- 25
## [57] -AAAAAD-RSSASSCSSASAAR- 54
## [58] -ARSAAR-SRSADDCSAARAAS- 43
## [59] DARSADRRSRCADDSAAASS--- 42
## [60] -ADSARARRSSCDASDCCSA-- 44
## [61] -ADSAARRASARSDSADCAAA-- 46
## [62] -AD-AAARRSSSSDRDRCAAAA- 45
## Con --??AA??SSS??AA?A?????- Consensus

```

Group 71

```

## use default substitution matrix

##
## MsaAMultipleAlignment with 178 rows and 26 columns
##      aln                      names
## [1] ARASASAASACSDAASSASS----- 15
## [2] ---SASCASAASSAASSASDCRA--- 144
## [3] -RSSAAAASSSCSDSSSDRRAD----- 73
## [4] ---SASASSSASSDSDSRDDSA--- 95
## [5] ---SARADSSAASARSSSASDSS--- 135
## [6] ---SARSRSSAASSRSSSASSSA--- 152
## [7] ---SDARDSSAAAARASAASDSA--- 172
## [8] --SSSSARSSARSARCARSRS---- 49
## [9] ---SASAASSASAASCADSSRSA--- 92
## ... ..
## [171] ---SACSASSASRASSSRAASSS--- 105
## [172] --SSSASSASASSASSSDSSRS---- 54
## [173] --SDSASRASSSARSSDSRAS---- 61
## [174] --SSSAADASASRASSRDAARS---- 37
## [175] -SCRRSRRSRSSSRSSDSRASS----- 60
## [176] SCCARSCASSASASSASRSS----- 81
## [177] --CASAAAASASAASSSRASS---- 140
## [178] -ACASAAAASSASSADSSRASS----- 141
## Con --?SS?A?SAAA??SS??SS??- Consensus

```

Group 72

```

## use default substitution matrix

```

```

##
## MsaAAMultipleAlignment with 192 rows and 29 columns
##      aln                                names
## [1] AAADRSSACASSADAARAAS----- 13
## [2] --DDSSSACASSRSAAASASAA----- 92
## [3] ----SSSSCSSSRAARAASAASA----- 117
## [4] ----SSASAAASSAAAAASAAAAA----- 84
## [5] ----RSSASAASSCRAAAASAAAAA----- 90
## [6] ----SSSASAASSAAADSASAAAAA----- 91
## [7] ---AAASAAASSSAAASACASAASS----- 48
## [8] ----RSAACSSSAAAASASAADAD----- 52
## [9] ----SSSAAAASSSASASDSDAAS----- 186
## ... ..
## [185] ----SARRARSAASADASRAAARD----- 11
## [186] ----SCRARCASRSASSASACAAR----- 5
## [187] ----SARCASARRAARSASAAASR----- 6
## [188] ---SAASRRRADSASRSASSAAS----- 37
## [189] ----SRRAASARADSSRASSAARR----- 7
## [190] ----SSADASADAASSCASAAARA----- 51
## [191] ---SSRSSASADSSRRSASAAAR----- 8
## [192] --SSSRSSASSRAAARSASSRA----- 61
## Con ----?SS?????SS?SAAAAA????---- Consensus

```

Group 73

```
## use default substitution matrix
```

```

##
## MsaAAMultipleAlignment with 74 rows and 26 columns
##      aln                                names
## [1] ----SRAACAAASRSCSARAAAAS-- 1
## [2] ---SARAASCASSRSCDAACAAA--- 24
## [3] ---SSRASAASAARSACRARAAS-- 49
## [4] ---SSSDASSAASRSSRSRS-RA-- 19
## [5] ---SSSSAASAAS-SRERSRAARA-- 20
## [6] ---SAAAAAASARRSSARSAAAAS-- 48
## [7] --ASRAARADSASRSARSAAAAS--- 56
## [8] ---SRAA--ASASRSSRRA----- 13
## [9] --RSAASAARSASSRCSRSAAA---- 54
## ... ..
## [67] --RAAASSAARSAS-ASAASARR--- 34
## [68] ----ARAASAAAAS-ASAARAAS-AR 33
## [69] -----RAAASAARS-ASAAAARSAAR 35
## [70] --ACCRAAASASAS-ASCAS----- 61
## [71] ---ASASAARAAAD-DSAACASAA-- 21
## [72] ---CRASCAAASSR-SSAARASAA-- 44
## [73] ---DSRSAASSDAS-DSCARARAA-- 22
## [74] ---ASSSAASADASDDSCA-ARAS-- 23
## Con ---???A?AAAA?SS?SA?AAA?---- Consensus

```

Group 74

```
## use default substitution matrix
```

```

##
## MsaAAMultipleAlignment with 106 rows and 27 columns
##      aln                      names
## [1] ---AARAAS-ARASSCSASSAAAS--- 1
## [2] ---AARASS-SSASAASASSAASS--- 62
## [3] ----SRACS-SSSSACSASSASSA-- 56
## [4] ----SRAAS-SSARASSAASASCSS-- 57
## [5] ----ARDSSRASRSSASASAASRAS-- 44
## [6] ----SSARS--DSSARSRAARSRS--- 8
## [7] ----SSSRSRASSSADSRASRRSS--- 38
## [8] ---RASARSCSCARSSCSAAARS---- 33
## [9] ---RASARDRRSARSSACSARRSS--- 59
## ... ..
## [99] ----RSRAADACSSASSSSSSAAS--- 26
## [100] ---SACSSASSCSSAASAAAAA---- 86
## [101] ---SSSAAARSACSASSRRAAS---- 16
## [102] ----RSAAADSACRSSSSSSASS--- 25
## [103] ---SRSASASSACSCDASCADS---- 43
## [104] ---ARDAASSSCSSSDASCSC----- 46
## [105] ----RSASAD-ACSDSCSSAAASR-- 27
## [106] ----SSSSSD-AASRSSSSAASD--- 28
## Con ----????SSSS?SA?S??AA??--- Consensus

```

Group 75

```
## use default substitution matrix
```

```

##
## MsaAAMultipleAlignment with 27 rows and 23 columns
##      aln                      names
## [1] ARASAAA-AAA-SDSACRSRDR- 1
## [2] AAASAAACAAA-SASACASAA-- 2
## [3] -RSDAAAAASR-SRSSRDSASR- 11
## [4] RSSDAASRDSS-CARSCDRSA-- 20
## [5] RSSRRADCSR-CRSCSSSA-- 21
## [6] -CSSAADARSRDSSSSASADS-- 9
## [7] RSSAASASSC--SAADSSARS- 26
## [8] RSSAASASSS--ARSASRACS- 27
## [9] RSSRAACAASA--SSAASRASS- 17
## ... ..
## [20] AACSSAAACAR-ASRDASSA-- 3
## [21] AASSASRDCAR-DSSSDACSR-- 4
## [22] RCSSAAADRRRSSAADDDA--- 7
## [23] -CSSASAADRRSDSASRASAA-- 8
## [24] ACSSASARAACARSSAACRA--- 5
## [25] AASSASAAARCAASRARSCA--- 6
## [26] -SSSARAAADSSSCRARSAAS-- 22
## [27] DSSSASASRDSSSARSSSAA--- 23
## Con ??SSAAA?A??-?SS??S?A?-- Consensus

```

Group 76

```
## use default substitution matrix
```

```

##
## MsaAAMultipleAlignment with 207 rows and 28 columns
##      aln                      names
## [1] -----RSSARASRCASRS-AARASA- 1
## [2] -----RSSASSSRCASAS-AAAASA- 2
## [3] -----SSSSASRSAAAS-AASA--- 19
## [4] -----CASASASRSAAASDAASAAA- 113
## [5] -----CSASSASRSASASCAASCAA- 114
## [6] -----AADAASRASSAAARSCAASA--- 42
## [7] -----SASSAASSAAARSAAA----- 184
## [8] ----AASSSASSASSAAAASCS----- 162
## [9] ----ASSSSSSSASSAAARSCAAA---- 182
## ... ..
## [200] ----AAS-RSSSSSSS-SASCAAAAA-- 167
## [201] ---SSRSDSASSSSDS-DRSCAAA---- 136
## [202] ----SRSDSASSSSDSADASAAAA---- 137
## [203] ----ARACSASSASSSSSSSAAAA---- 156
## [204] ----ARACSRSAASSARASSAAAA---- 188
## [205] ----AASADASASSSARSRRAAS--- 194
## [206] ----ASSASRRSASSSARSS-AAA---- 196
## [207] ----ARSASSSSASSSARSRSA--- 195
## Con ----?????S?SSSA????AAA---- Consensus

```

Group 77

```
## use default substitution matrix
```

```

##
## MsaAAMultipleAlignment with 149 rows and 28 columns
##      aln                      names
## [1] -----SASRRACASDASAAARSA-- 1
## [2] -----ASASASRRAAASDASARA-SA-- 124
## [3] -----SCARSSAASAASASDRRRA-- 16
## [4] -----SAARASAACDASASASDAAS-- 132
## [5] -----SSARRDAASDASCAASASAA-- 120
## [6] -----SACRASASAASSARRSARAAA- 21
## [7] -----SAARASDRAASSASSAACA-- 22
## [8] -----SRACDRSAASAASAASAAAA- 24
## [9] -----DSSACDRSASSAAAASSSAA-- 123
## ... ..
## [142] ----SAASRSDACSRRRRRCARA---- 6
## [143] ----SSAASSAAAAADRRAASAAA--- 100
## [144] ----RSSARRAAAAADSRRARSAA---- 144
## [145] ----ARSSRAAAAASDRR-ASCSA--- 140
## [146] ----RSSARAADASSRRDRSRAA--- 145
## [147] ----ASSARSSACSAS-ADSAA---- 83
## [148] ----SSRAASRACSSS-ADSAAASA- 90
## [149] ----DASRARSAAACSSRDASSAAA--- 109
## Con ----?SS????????S????AAA?-- Consensus

```

Group 78

```
## use default substitution matrix
```

```

##
## MsaAAMultipleAlignment with 34 rows and 27 columns
##      aln                      names
## [1] ---ARR--ASSASRRSASAARASDSS- 6
## [2] --SAAR--RSSASRRSASASRA-DS-- 8
## [3] ---SAR--RSSASRRSASAAAASSRA-- 5
## [4] ---AAS--CSAASSRSASAARRSDA-- 28
## [5] --SASR--SSRCRAASASARSRSD--- 13
## [6] ---ASR--SS-ARSAS-SARRRSS--- 15
## [7] --SAAR--RSASRSASAAACRDAA--- 7
## [8] ---ARC--SCSARSASAAARDSASR-- 10
## [9] SADSRD--SCSARSASAAAR-SA---- 11
## ... ..
## [27] --ASAA--ASSAARS--SSCR----- 20
## [28] ----AA--ASSAARADRSRSDARASA- 26
## [29] --RADS--AASASCADSSRSCDAD--- 16
## [30] ---SAD--SACRS-ASASSRSACDA- 17
## [31] ----AD--SSDSR-ASASSARAACRAA 23
## [32] ---CAD--RDSRA-ASASAARAARAD- 24
## [33] ----AD--RASRASASSSRACSAAAD- 21
## [34] ----AD--RSSAASASSSCACARCSD- 22
## Con ---?A?--?S?A???SASA?R????-- Consensus

```

Group 79

```
## use default substitution matrix
```

```

##
## MsaAAMultipleAlignment with 146 rows and 28 columns
##      aln                      names
## [1] --SASRS--S-AAAAASRSCSSAS--- 18
## [2] -RACARS--SSAAAAAARSSCAR----- 123
## [3] ----ARS--SSARAASSRSRSASARR-- 122
## [4] AASSRSR--SAASAARSSA--ASS----- 91
## [5] RASSASS--AAASAARSSA--ACSS---- 103
## [6] ---SSA--SAASCARRSA--ASSAAD- 72
## [7] ---SRAR--SAASAARSSARDAASA--- 13
## [8] -----AAARASARARSSSAAR----- 125
## [9] -----ASCAACASAAAASSSASRAAS-- 136
## ... ..
## [139] --AAASA--RSAARAR-SSSDCAAS--- 38
## [140] --RSASC--AAAARRRSSRRARAS--- 42
## [141] --RSASS--AAASRRRSSCASA-AS--- 43
## [142] --ASASA--ARASDARSSSRRRA-SS--- 40
## [143] --SASSA--SDSADARSSCRA-ARR--- 118
## [144] ---ASAS--SACAAARSSCRASAAR--- 119
## [145] --SARSS--ASAARAAAACSS-SRR--- 120
## [146] --AARSS--RDADRAASSRAS-ARR--- 121
## Con ---???S--A???AA??SSS?AAA?--- Consensus

```

Group 80

```
## use default substitution matrix
```



```

##
## MsaAMultipleAlignment with 140 rows and 26 columns
##      aln                      names
## [1] ----ASSCASCS-SASCAASRSAR-- 7
## [2] ----RSSRASSSASASCASSRAAC-- 8
## [3] ---ASSSSAASSASRASASRDRA--- 11
## [4] --RASSSSAASSASSRSAS-DAA--- 12
## [5] ---AARSRASSSSDASSASSASA--- 90
## [6] ----SASASSSSSAASSASSASAR-- 119
## [7] ---AASSSCSSASSRRAASARSSS-- 15
## [8] ----ASSACSAASSRRAASRASAS-- 20
## [9] ---ASSASSAASSSSAASAASSA-- 17
## ... ..
## [133] -ASSAARSAARSSSSSRARCAA---- 46
## [134] ---AARASASRASARRARCAAS--- 58
## [135] --ASARACASRASASSRAR-DAS--- 59
## [136] --AASAACSSARSRRARCCA---- 44
## [137] ----AASSASRSCSSSRRAASA-- 42
## [138] ----RRSSARRRSSARSSAASA-- 113
## [139] ---RARASAADRASSSARSASDAS--- 51
## [140] --ARADASSDRSSRRSDA---- 55
## Con --??A??S????SSS?AS??---- Consensus

```

Group 81

```
## use default substitution matrix
```

```

##
## MsaAMultipleAlignment with 259 rows and 31 columns
##      aln                      names
## [1] -----ARSAARARARCSSSSAS--ASA--- 1
## [2] -----ASSAARASARASSASAS--ASSA-- 72
## [3] ----RAASSASRARARDSSARSS--A----- 101
## [4] -----ASSAAARASARASCSASA--AS---- 73
## [5] -----AASSAARADARASSSASS--SS---- 200
## [6] -----CSAARRASARDSASSDA--SSS--- 5
## [7] -----ASSAARASAAAASSAA--SSSS-- 71
## [8] -----AARRASARARSSSAR--ASADS- 10
## [9] -----AASRASARRRSSSAR---SASS- 11
## ... ..
## [252] -----ASRAARASCASARDSDS--SSR--- 218
## [253] -----SSSAAAASCASASDAAS--SRR--- 181
## [254] -ARRAACASARSAARSAASSS----- 85
## [255] ----AASAAARRAARSAASSASS--R----- 220
## [256] -----AASSASSAARAAAASCAS--AA---- 130
## [257] -----ACSSSRSAAAAAAASSAS--AAS--- 233
## [258] ----AASSSAASAARSAASSAS--D----- 249
## [259] -----AASSASSAASAASSAS--SS---- 131
## Con -----???????A??A??S??S--S?---- Consensus

```
