# Supplementary material
Source: PubMed Central journal article supplement (PMC5786472)

FIGURE S1

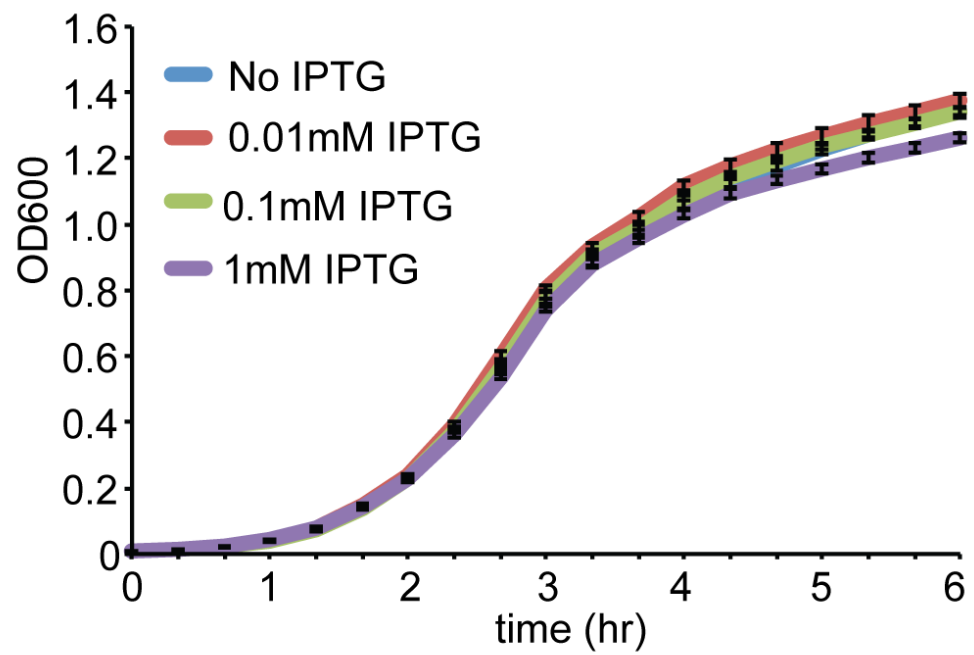

Supplement: NIHMS926512-supplement-1.pdf [file NIHMS926512-supplement-1.pdf]

FIGURE S2

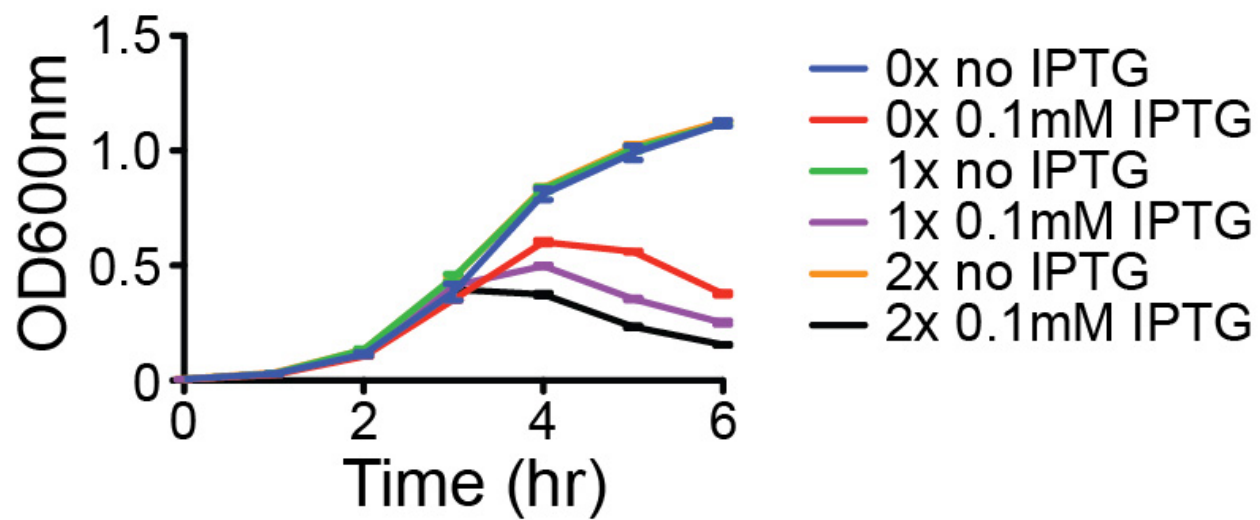

Supplement: NIHMS926512-supplement-2.pdf [file NIHMS926512-supplement-2.pdf]

FIGURE S3

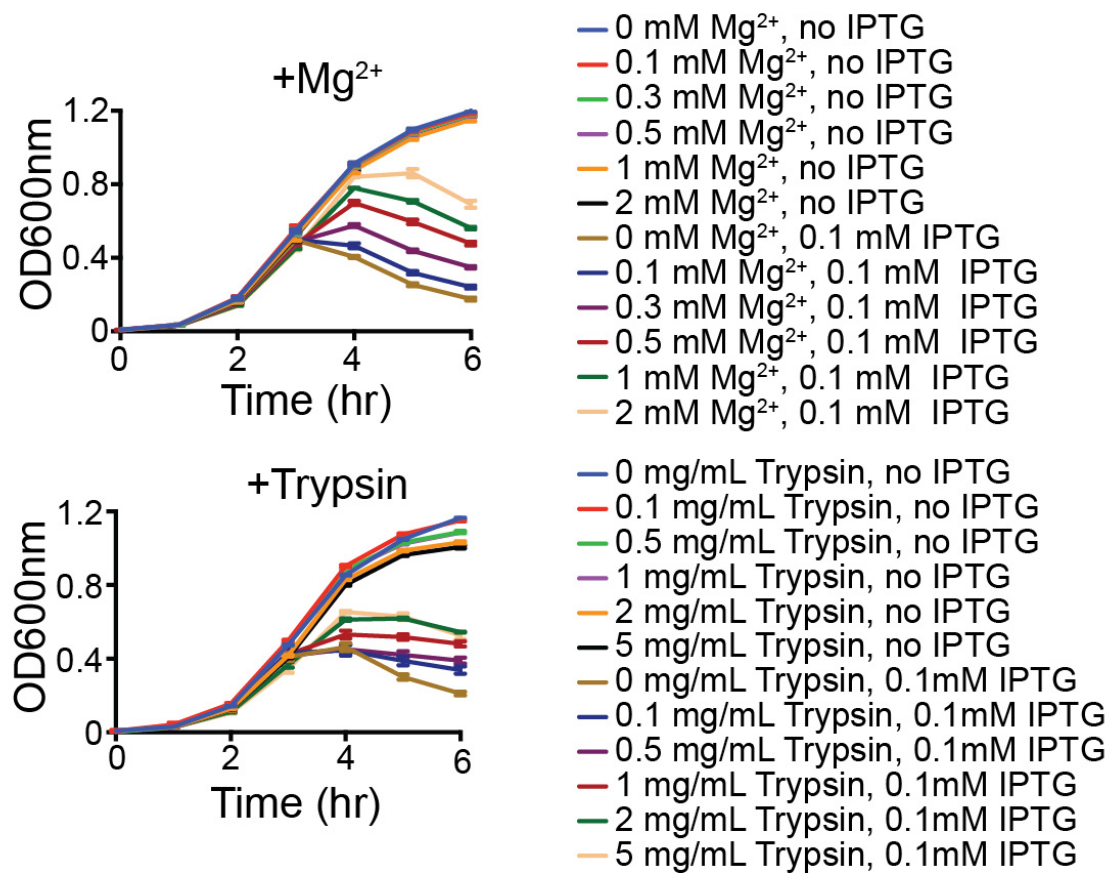

Supplement: NIHMS926512-supplement-3.pdf [file NIHMS926512-supplement-3.pdf]

FIGURE S4

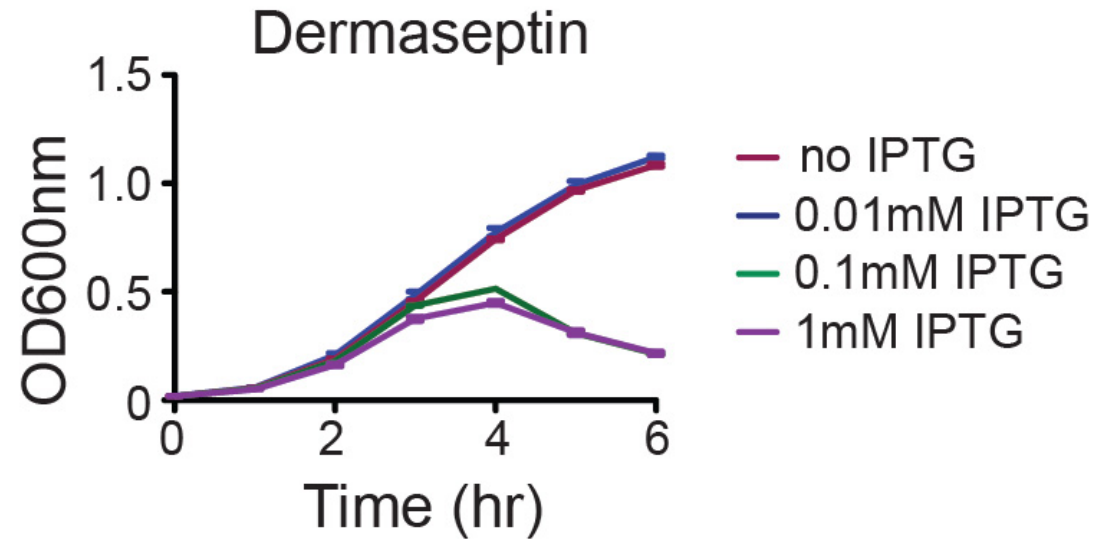

Supplement: NIHMS926512-supplement-4.pdf [file NIHMS926512-supplement-4.pdf]

FIGURE S5

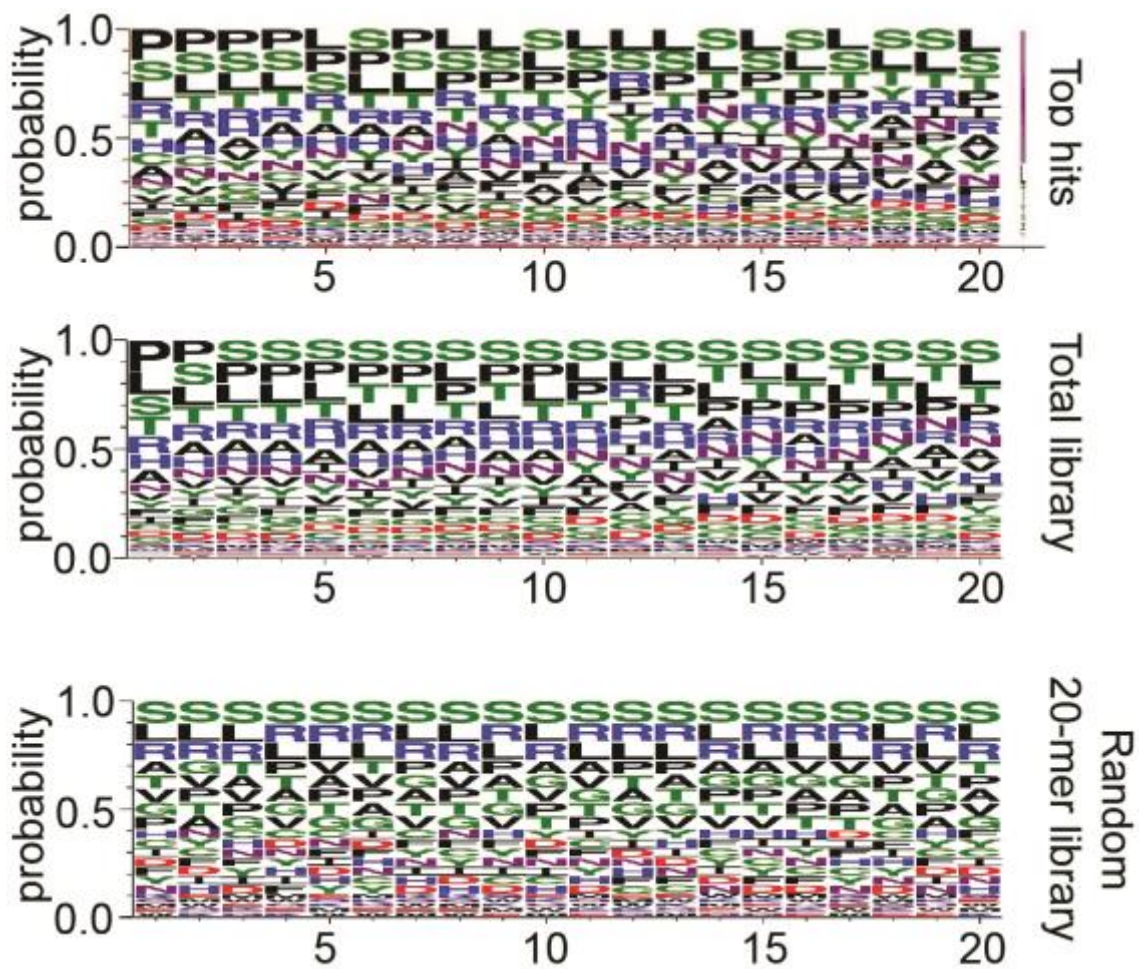

Supplement: NIHMS926512-supplement-5.pdf [file NIHMS926512-supplement-5.pdf]

FIGURE S6

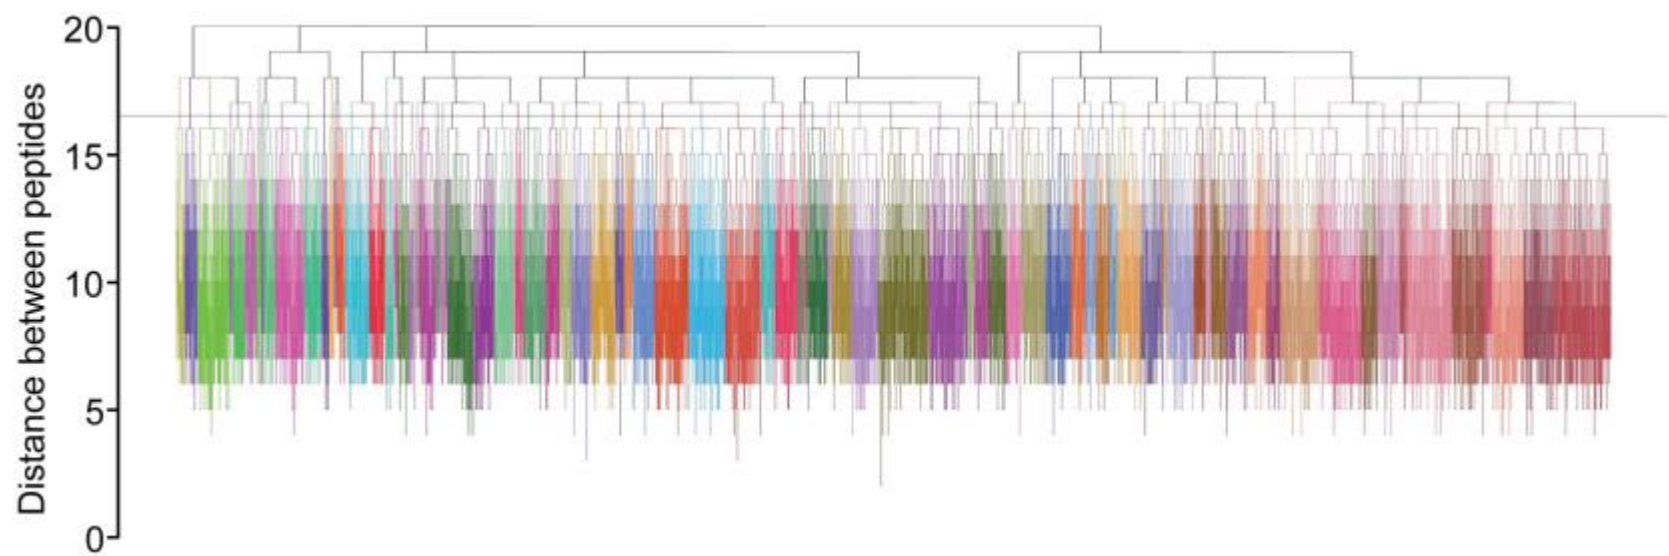

Supplement: NIHMS926512-supplement-6.pdf [file NIHMS926512-supplement-6.pdf]

FIGURE S7

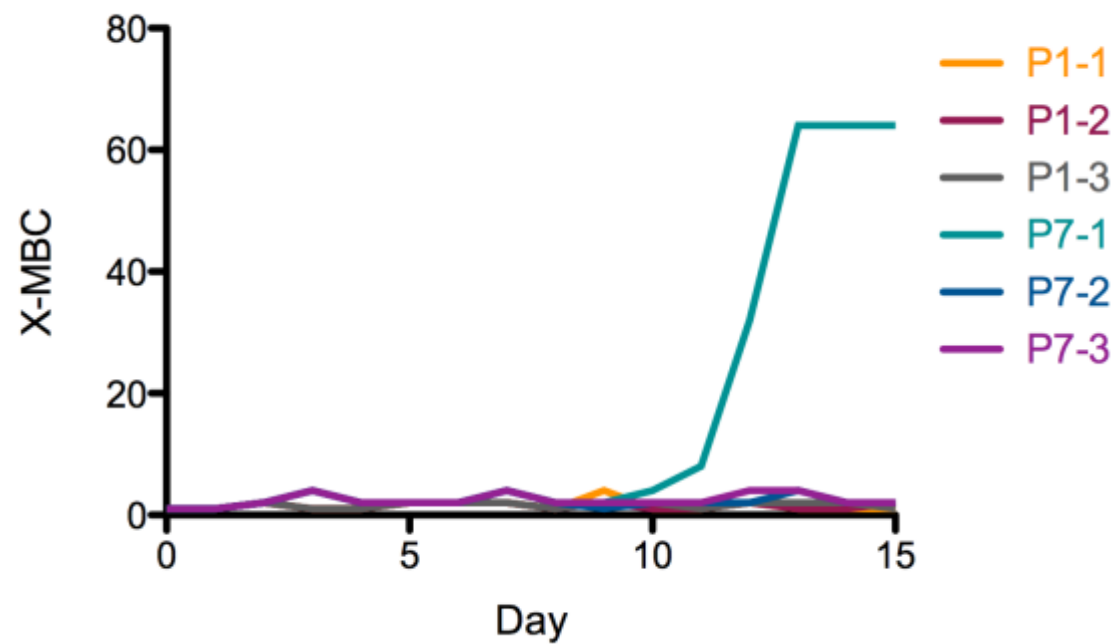

Supplement: NIHMS926512-supplement-7.pdf [file NIHMS926512-supplement-7.pdf]
